# Supplementary material for: Discovery of Unusual Cyanobacterial Tryptophan-containing Anabaenopeptins by MS/MS Based Molecular Networking
Source: Preprints.org preprint supplement (doi:10.20944/preprints202007.0562.v1), 2020-07-23
Supplement: Supplementary file 3 [file supplementary]

Supplementary Materials

Discovery of unusual cyanobacterial tryptophan-containing anabaenopeptins by MS/MS based molecular networking

Subhasish Saha1#, Germana Esposito2#, Petra Urajová1, Jan Mareš1,3, Daniela Ewe1, Alessia Caso2, Markéta Macho1,4, Kateřina Delawská1,4, Andreja Kust1,3, Pavel Hrouzek1, Josef Juráň4,5, Valeria Costantino3 and Kumar Saurav1*

1Laboratory of Algal Biotechnology-Centre Algatech, Institute of Microbiology of the Czech Academy of Sciences, Třeboň, Czech Republic, [saha@alga.cz](mailto:saha@alga.cz) (S.S.); [urajova@alga.cz](mailto:urajova@alga.cz) (P.E.); [ewe@alga.cz](mailto:ewe@alga.cz) (D.E.); [macho@alga.cz](mailto:macho@alga.cz) (M.M.); [delawska@alga.cz](mailto:delawska@alga.cz) (K.D.); [kust@alga.cz](mailto:kust@alga.cz) (A.K.); [sauravverma17@gmail.com](mailto:sauravverma17@gmail.com) (K.S.)

2TheBlue Chemistry lab, Università degli Studi di Napoli, task Force "BigFed2, Napoli, Italy, [germana.esposito@unina.it](mailto:germana.esposito@unina.it) (G.E.); [alessia.caso@unina.it](mailto:alessia.caso@unina.it) (A.C.); [valeria.costantino@unina.it](mailto:valeria.costantino@unina.it) (V.C.).

3Biology Centre of the Czech Academy of Sciences, Institute of Hydrobiology,České Budějovice, Czech Republic. andreja.kust@gmail.com (A.K.), [jan.mares@centrum.cz](mailto:jan.mares@centrum.cz) (J.M.)

4University of South Bohemia, Faculty of Science, Branišovská 1760, České Budějovice, Czech Republic. [delawska@alga.cz](mailto:delawska@alga.cz) (K.D.); [macho@alga.cz](mailto:macho@alga.cz) (M.M)

5Institute of Botany of the Czech Academy of Sciences, Třeboň, Czech Republic, [juran.josef@seznam.cz](mailto:juran.josef@seznam.cz) (J.J.).

#Equal contribution

*****Correspondence: [valeria.costantino@unina.it](mailto:valeria.costantino@unina.it) (V.C.), [sauravverma17@gmail.com](mailto:sauravverma17@gmail.com) (K.S.); Tel.: (+420-737-003-359 (K.S.).

Received: date; Accepted: date; Published: date

**Table S1**. Biosynthetic gene clusters (BGCs) predicted from the genome of *Brasilonema* sp. CT11 using antiSMASH. Out of the 36 clusters identified, four clusters possess 100% similarity with other known BGCs whereas only two clusters were detected with more than 75% similarity with BGCs of known compounds.

**Table S2**. Summary of deduced proteins in the anabaenopeptin biosynthetic pathway in *Brasilonema* sp. CT11 and their closest homologues.

**Table S3**. Summary of adenylation domains and their substrates involved in anabaenopeptin biosynthesis in *Brasilonema* sp. CT11.

**Figure S1**. Molecular networking analyses of the crude extract of *Brasilonema* CT11 analyzed via LC-HRMS/MS. Labelled box represents the cluster containing APT molecules.

**Figure S2**. HR-MS/MS product ion spectra of protonated anabenopeptin 802 **2a** and **2b** from *Brasilonema* CT11.

**Table S4.** NMR data of anabenopeptin 802a (**2a**) (700 MHz, CD3OD).

**Figure S3.** 1H-NMR spectrum of anabenopeptin 802a (**2a**) (700 MHz, CD3OD).

**Figure S4.** COSY spectrum of anabenopeptin 802a (**2a**) (700 MHz, CD3OD).

**Figure S5.** NOESY spectrum of anabenopeptin 802a (**2a**) (700 MHz, CD3OD).

**Figure S6.** HSQC spectrum of anabenopeptin 802a (**2a**) (700 MHz, CD3OD).

**Figure S7.** HMBC spectrum of anabenopeptin 802a (**2a**) (700 MHz, CD3OD).

**Figure S8.** TOCSY spectrum of anabenopeptin 802a (**2a**) (700 MHz, CD3OD).

**Table S5.** NMR data of anabenopeptin 802b (**2b**) (700 MHz, CD3OD).

**Figure S9.** 1H-NMR spectrum of anabenopeptin 802b (**2b**) (700 MHz, CD3OD).

**Figure S10.** COSY spectrum of anabenopeptin 802b (**2b**) (700 MHz, CD3OD).

**Figure S11.** NOESY spectrum of anabenopeptin 802b (**2b**) (700 MHz, CD3OD).

**Figure S12.** HSQC spectrum of anabenopeptin 802b (**2b**) (700 MHz, CD3OD).

**Figure S13.** HMBC spectrum of anabenopeptin 802b (**2b**) (700 MHz, CD3OD).

**Figure S14.** TOCSY spectrum of anabenopeptin 802b (**2b**) (700 MHz, CD3OD).

**Table S1**. BGCs predicted from this strain using antiSMASH. Out of the 36 clusters identified, four clusters possess 100% similarity with other known BGCs whereas only two clusters were detected with more than 75% similarity with BGCs of known compounds.

| **Metabolite Class** | ***Brasilonema* CT11** | **Most similar known cluster (%)** |
| --- | --- | --- |
| PKS I | 01 | Merocyclophane C/D (22%) |
| NRPS | 12 | Anabaenopeptin 908/915 (100%) |
| PKS-NRPS Hybrid | 06 | Nostopeptolide A2 (100%) |
| Terpene | 03 | Geosmin (100%) |
| RiPP | 02 | - |
| Bacteriocin | 04 | - |
| Indole | 01 | Staurosporine (26%) |
| Mixed | 04 | - |
| Others | 03 | - |

**Table S2**. Summary of deduced proteins in the anabaenopeptin biosynthetic pathway in *Brasilonema* sp. CT11 and their closest homologues.

| **Anabaenopeptin pathway** | | | **Closest homologue (BLASTp)** | | | | **Top BLASTp hit with known function** | | | | |
| --- | --- | --- | --- | --- | --- | --- | --- | --- | --- | --- | --- |
| **Protein** | **Size [aa]** | **Proposed Function** | **Accession** | **Organism** | **Identity [%]** | **Function** | **Accession** | **Organism** | | **Identity [%]** | **Function** |
| AptA | 2201 | NRPS | WP_171976800.1 | *Brasilonema* (multispecies) | 89 | NRPS (hypothetical) | AVK43380.1 | *Nostoc* sp. N135.9.1 | | 81 | NRPS - AptA (anabaenopeptin pathway) |
| AptB | 1069 | NRPS | WP_073634533.1 | *Scytonema* sp. HK-05 | 87 | NRPS (hypothetical) | ASR75186.1 | *Nostoc* sp. KVJ2 | | 83 | NRPS - AptB (anabaenopeptin pathway) |
| AptC | 2588 | NRPS | WP_073634532.1 | *Scytonema* sp. HK-05 | 84 | NRPS (hypothetical) | AVK43394.1 | *Nostoc* sp. XHIID C2 | | 82 | NRPS - AptC (anabaenopeptin pathway) |
| ORF1 | 206 | unknown | WP_073634531.1 | *Scytonema* sp. HK-05 | 88 | Uma2 family endonuclease (hypothetical) | no hit | | | | |
| AptD | 1397 | NRPS | WP_171976805.1 | *Brasilonema* (multispecies) | 91 | NRPS (hypothetical) | AVK43292.1 | *Nodularia* *spumigena* AV2 | | 83 | NRPS - AptD (anabaenopeptin pathway) |
| AptE | 736 | ABC transporter | WP_171976806.1 | *Brasilonema* (multispecies) | 82 | ATP-binding cassette domain-containing protein (hypothetical) | AVV48476.1 | *Anabaena* sp. SYKE748A | 71 | | ABC transporter - AptE (anabaenopeptin pathway) |

**Table S3**. Summary of adenylation domains and their substrates involved in anabaenopeptin biosynthesis in *Brasilonema* sp. CT11.

| **Protein** | **Domain (aa range)** | **Closest annotated BLAST hit (aa range)** | **Identity [%]** | **Predicted substrate (antiSMASH)** | **Incorporated aa residue in anabaenopeptin** |
| --- | --- | --- | --- | --- | --- |
| AptA | A0 (46-449) | AptA1, *Nostoc* sp. 268, AVK43337.1 (47-446) | 83 | Val/Ile | L-Val/L-Leu |
|  | A1 (1130-1537) | AptA2, *Nostoc* sp. N135.9.1, AVK43380.1 (1121-1523) | 82 | Lys | D-Lys |
| AptB | A2 (450-848) | AptB, *Nostoc* sp. XHIID C2, AVK43393.1 (470-867) | 84 | Leu/Ile | L-Leu/L-Ile/L-Val |
| AptC | A3 (511-905) | AptD, *Nostoc* sp. KVJ2, ASR75188.1 (544-937) | 80 | Leu | L-Trp |
|  | A4 (1563-1972) | AptC, *Nostoc* sp. XHIID C2, AVK43394.1 (1569-1967) | 82 | Ala | L-*N*MeAla |
| AptD | A5 (545-939) | AptD, *Nodularia spumigena* 309, AVK43275.1 (546-937) | 82 | Phe | L-Phe |


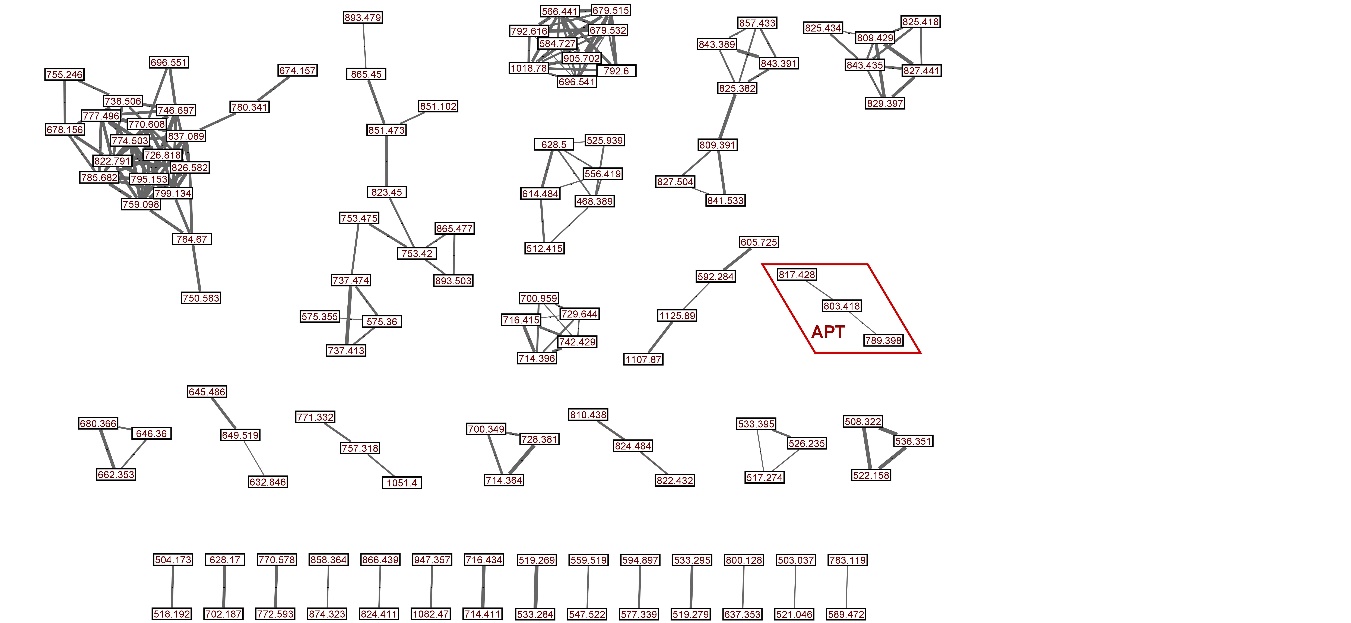


**Figure S1**. Molecular networking analyses of the crude extract of *Brasilonema* CT11 analyzed via LC-HRMS/MS. Labelled box represents the cluster containing APT molecules.


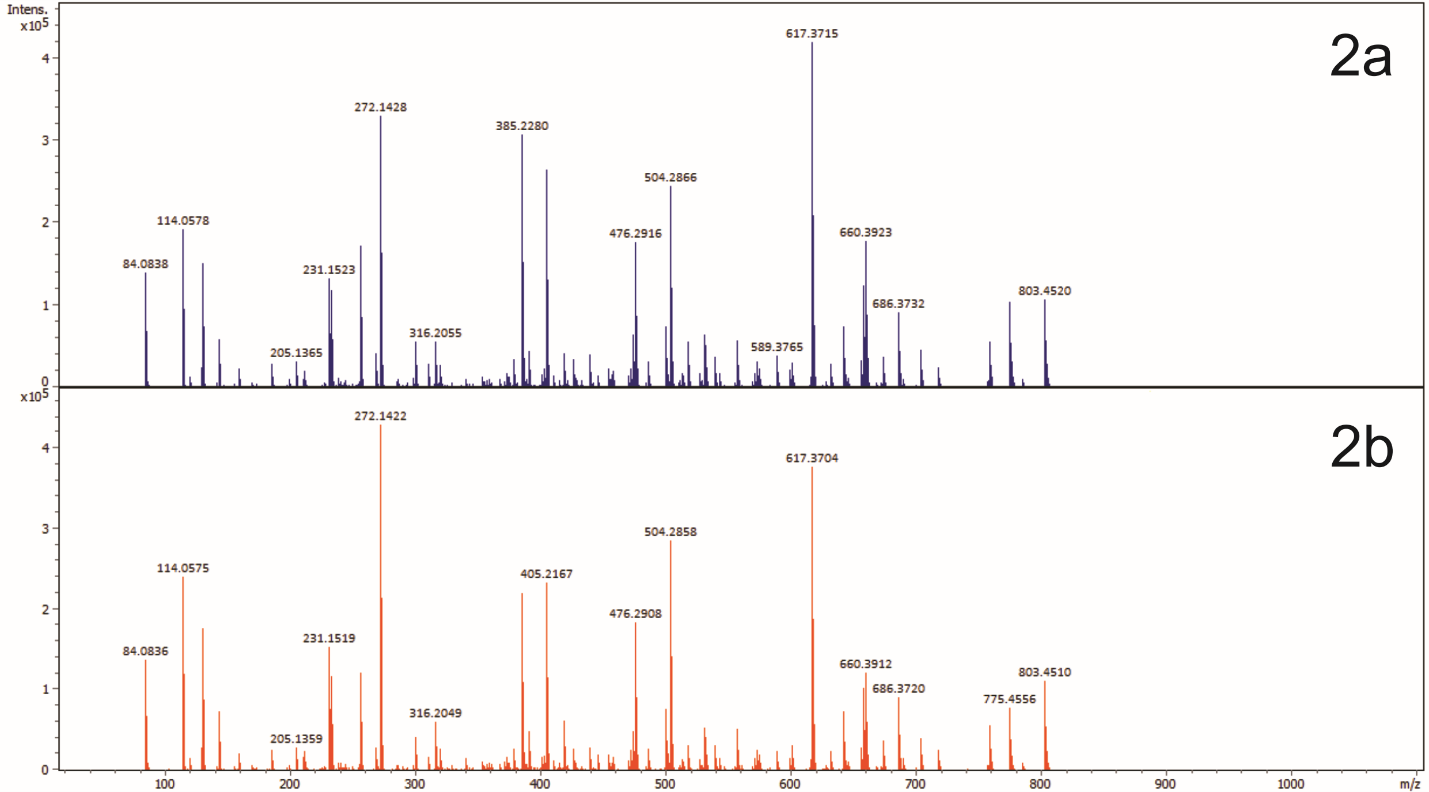


**Figure S2**. HR-MS/MS product ion spectra of protonated anabenopeptin 802 **2a** and **2b** from *Brasilonema* CT11.

**Table S4.** NMR data of anabenopeptin 802a (**2a**) (700 MHz, CD3OD)

|  | Position | dC, type |  | dH, mult (J in Hz) | HMBCa | NOESY |  |
| --- | --- | --- | --- | --- | --- | --- | --- |
|  |  |  |  |  |  |  |  |
| Val | NH |  |  | 8.40, br s |  |  |  |
|  | 1 | 175.9, C |  | - |  |  |  |
| 2 | 59.7, CH |  | 4.18, br s |  |  |  |
| 3 | 31.6, CH |  | 2.25, m |  | 4, 5 |  |
| 4 | 17.3, CH3 |  | 0.91, d (6.9) | 2, 3, 5 | 2, 3 |  |
| 5 | 19.8, CH3 |  | 0.98, d (6.9) | 2, 3, 4 | 2, 3 |  |
| C=O | 6 | 159.6, C |  | - |  |  |  |
| Lys | NH |  |  | 8.40, br s |  |  |  |
|  | 1 | 175.9, C |  | - |  |  |  |
| 2 | 56.0, CH |  | 4.15, t (4.6) | 1, 3, 4, 6, 7 | 3a |  |
| 3 | 32.3, CH2 | a | 1.75, m | 1, 2 |  |  |
|  |  | b | 1.93, m | 1 |  |  |
| 4 | 21.5, CH2 | a | 1.26, m |  |  |  |
|  |  | b | 1.45, m |  |  |  |
| 5 | 35.6, CH2 |  | 1.51, m |  |  |  |
| 6 | 39.8, CH2 | a | 2.92, br d (12.6) |  | 6b |  |
|  |  | b | 3.75, m |  | 6a |  |
|  | NH |  |  | 7.82, d (8.0) |  |  |  |
| Phe | NH |  |  | 9.21, d (8.8) |  |  |  |
|  | 1 | 174.0, C |  | - |  |  |  |
| 2 | 56.6, CH |  | 4.5, ddd (12.5, 8.7, 2.9) | 1, 3, 4 | 3a |  |
| 3 | 38.6, CH2 | a | 2.86, t (13.2) | 2, 4, 5/9 |  |  |
|  |  | b | 3.38, dd (13.7, 3.1) | 4, 5/9 | 3a |  |
| 4 | 139.4, C |  | - |  |  |  |
| 5/9 | 129.9, CH |  | 7.11, d (7.6) | 3, 6, 7 | 2, 3a |  |
| 6/8 | 129.5, CH |  | 7.21, t (7.6) | 4, 5/9 |  |  |
| 7 | 127.3, CH |  | 7.14, t (7.6) | 5/9 |  |  |
|  |  |  |  |  |  |  |  |
|  |  |  |  |  |  |  |  |
| NMeAla | 1 | 173.3, C |  | - |  |  |  |
| 2 | 56.6, CH |  | 4.60, q (6.7) | 1, 3, 4 | 3 |  |
| 3 | 12.5, CH3 |  | -0.26, d (6.7) | 1, 2 | 2 |  |
| 4 | 27.9, CH3 |  | 1.57, s | 2, C1-Trp |  |  |
| Trp | NH |  |  | 8.97, d (3.2) |  |  |  |
|  | 1 | 174.0, C |  | - |  |  |  |
| 2 | 51.7, CH |  | 5.05, dt (11.2, 5.0, 3.7) | 1, 3, 4 |  |  |
| 3 | 28.8, CH2 |  | 3.27, m | 1, 2, 4, 5 |  |  |
| 4 | 109.8, C |  | - |  |  |  |
| 5 | 124.5, CH |  | 7.05, s | 3, 4, 6, 11 | 10 |  |
| 6 | 128.7, C |  | - |  |  |  |
| 7 | 112.3, CH |  | 7.31, d (8.1) | 6, 8 |  |  |
| 8 | 119.9, CH |  | 7.02, t (7.4) | 6, 7 | 10 |  |
| 9 | 122.3, CH |  | 7.09, br d (7.6) | 10, 11 |  |  |
| 10 | 119.0, CH |  | 7.57, d (7.9) | 4, 6, 9, 11 | 5, 8, 9 |  |
| 11 | 137.8, C |  | - |  |  |  |
|  | NH |  |  | 7.90, s |  |  |  |
| Ile | NH |  |  | 7.78, br s |  |  |  |
|  | 1 | 173.9, C |  | - |  |  |  |
| 2 | 59.3, CH |  | 4.04, dd (9.6, 4.9) | 1, 3 | 3 |  |
| 3 | 36.9, CH |  | 1.96, m |  |  |  |
| 4 | 15.3, CH3 |  | 1.17, d (6.8) | 2, 3 |  |  |
| 5 | 19.8, CH2 |  | 1.38, m | 6 |  |  |
| 6 | 14.0, CH3 |  | 0.93, t (7.4) | 5 | 2 |  |

a Selected HMBC correlations from proton stated to the indicated carbon.


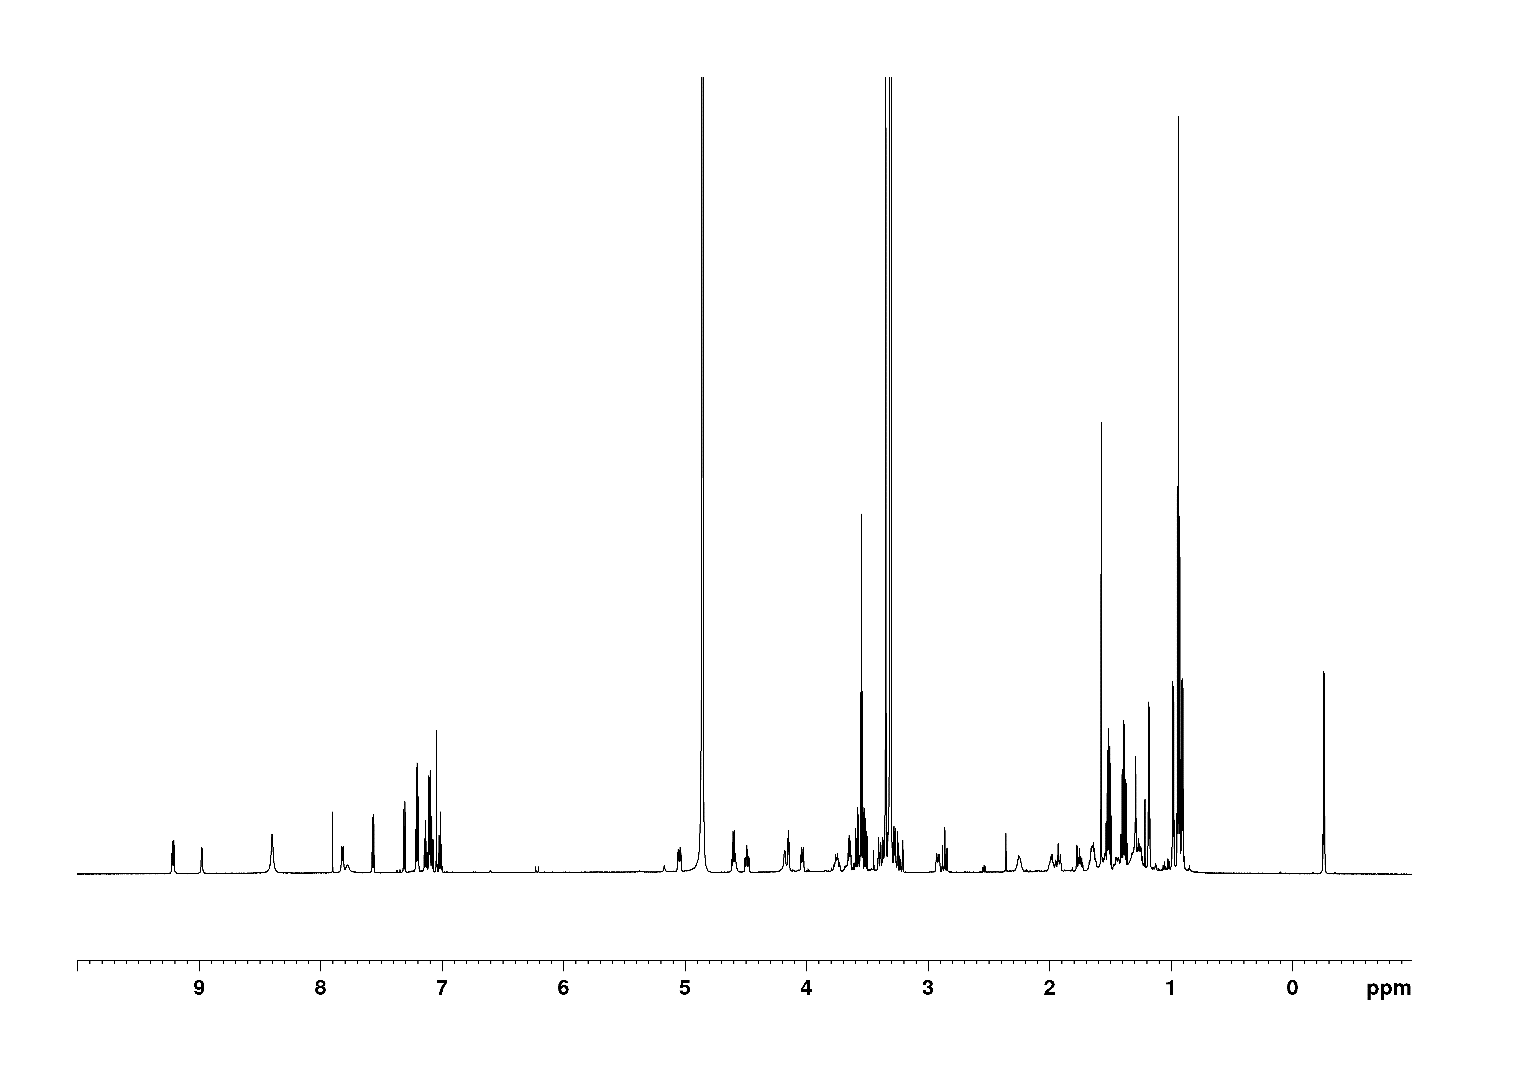


**Figure S3.** 1H-NMR spectrum of anabenopeptin 802 (**2a**) (700 MHz, CD3OD)

**
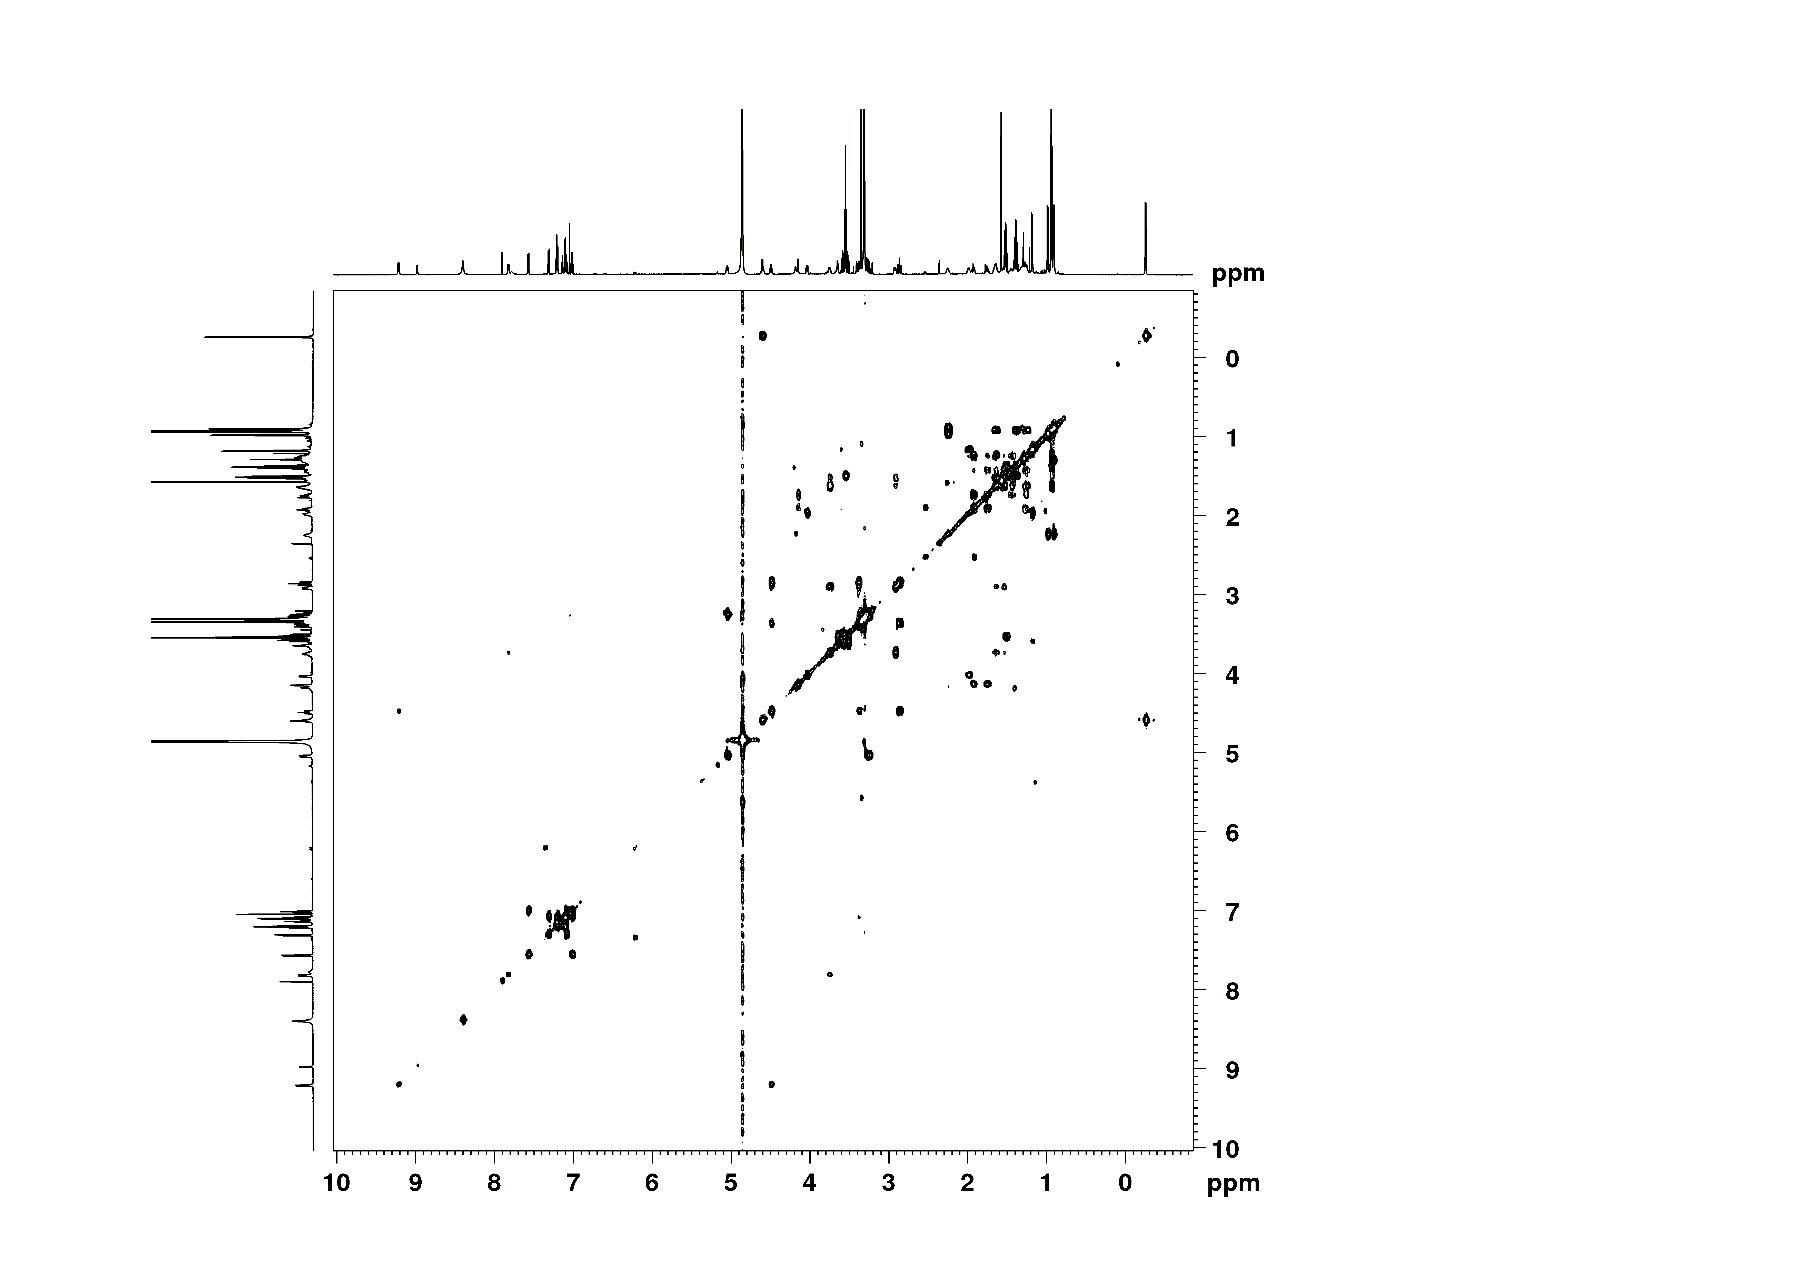
**

**Figure S4.** COSY spectrum of anabenopeptin 802 (**2a**) (700 MHz, CD3OD)

**
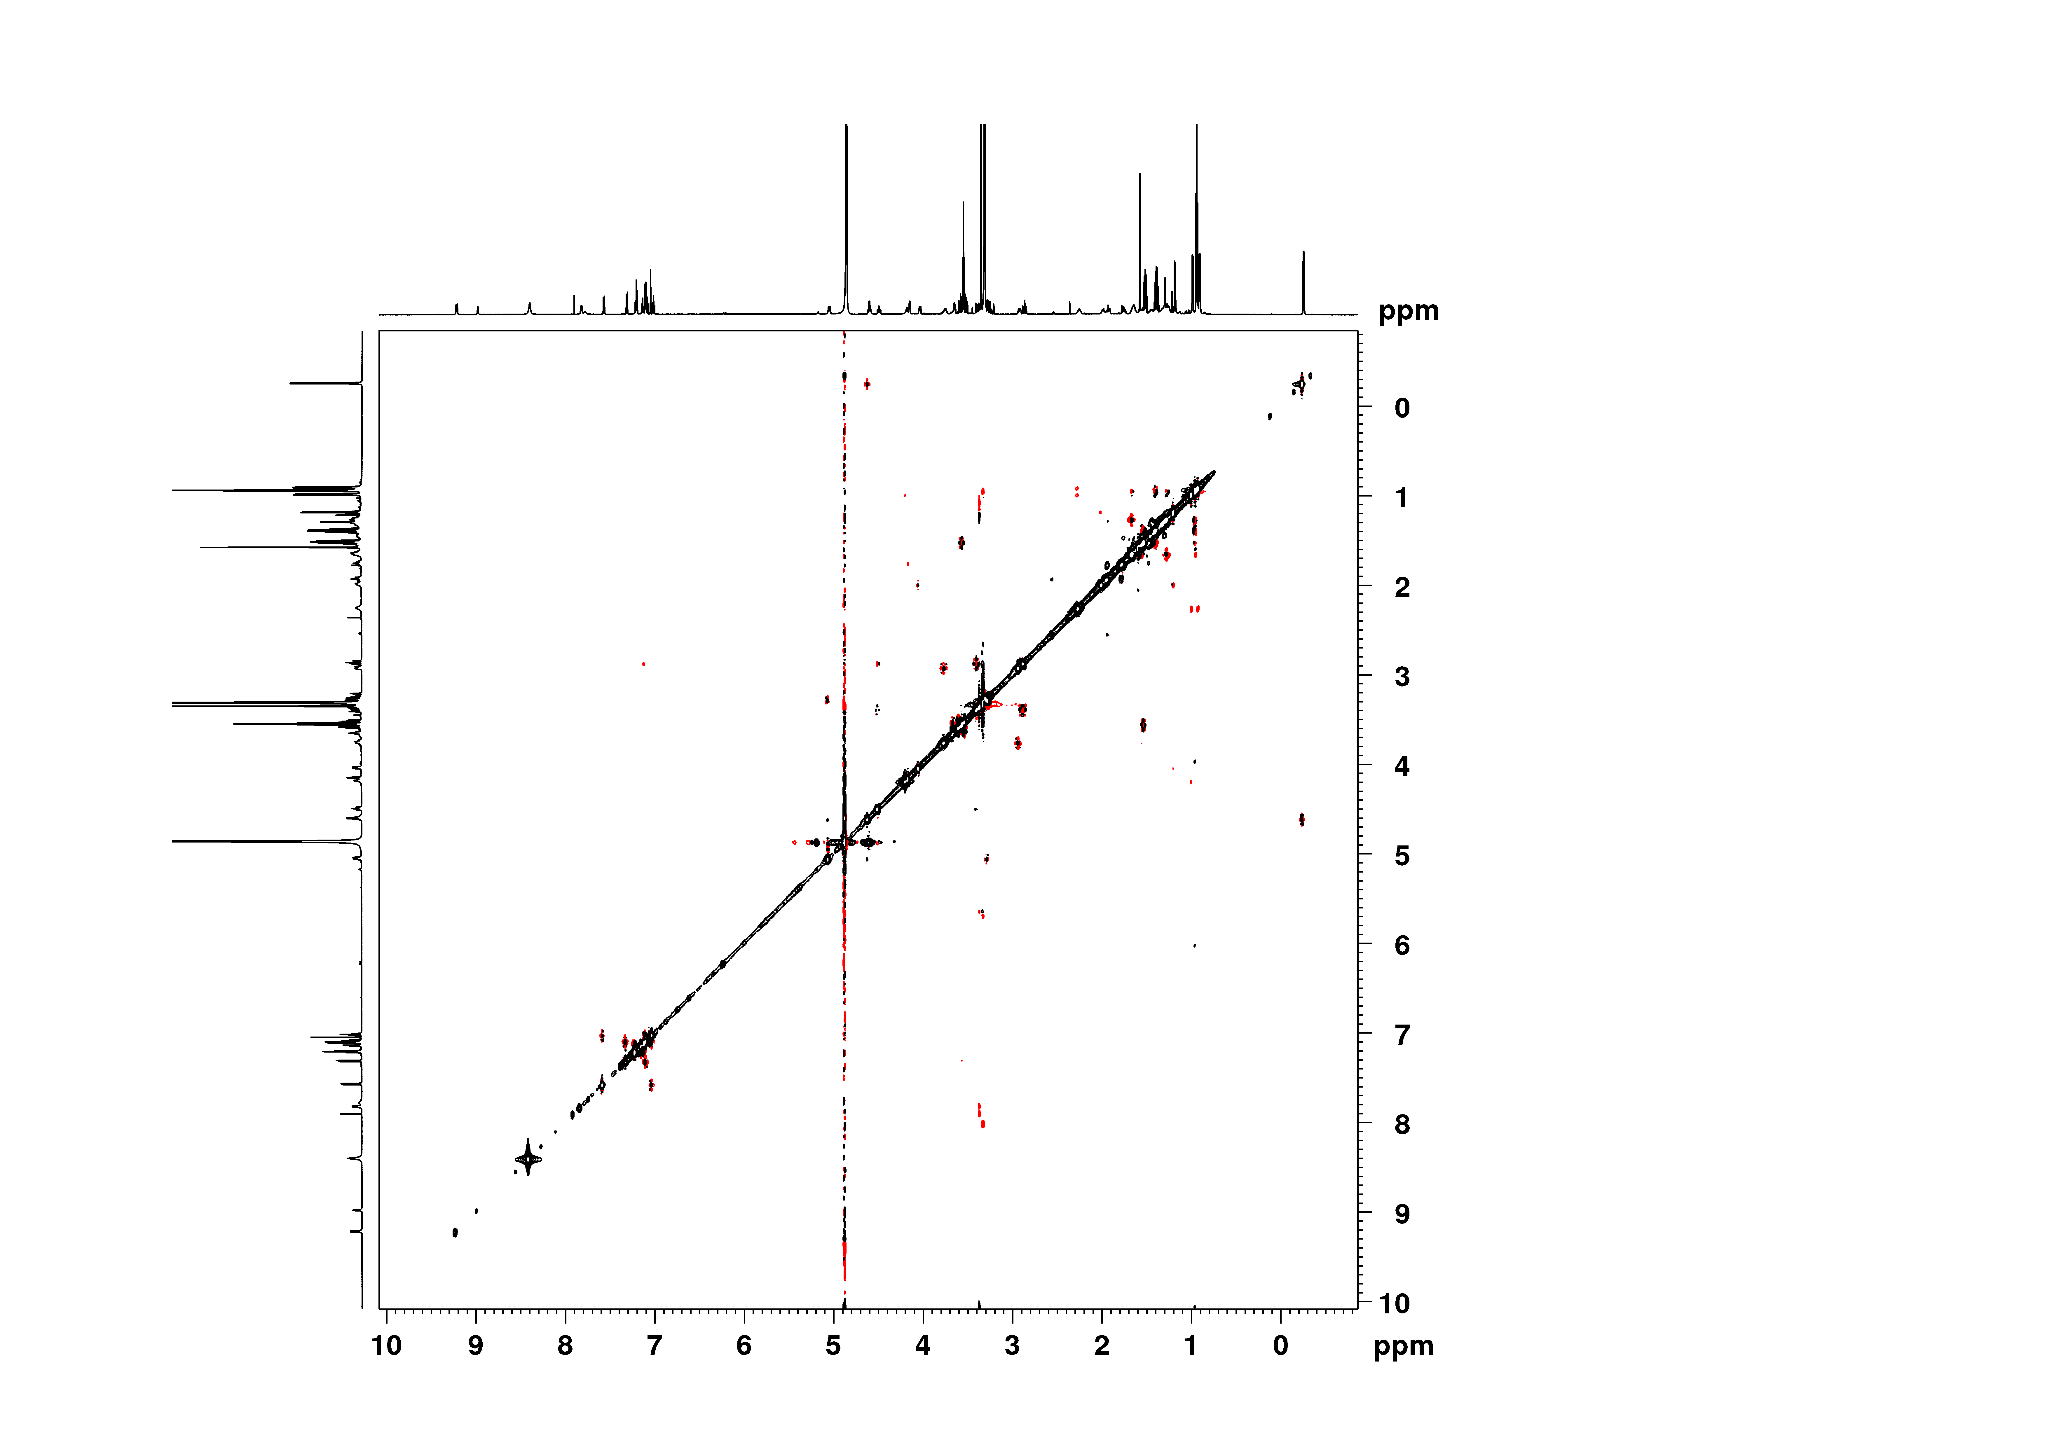
**

**Figure S5.** NOESY spectrum of anabenopeptin 802 (**2a**) (700 MHz, CD3OD)


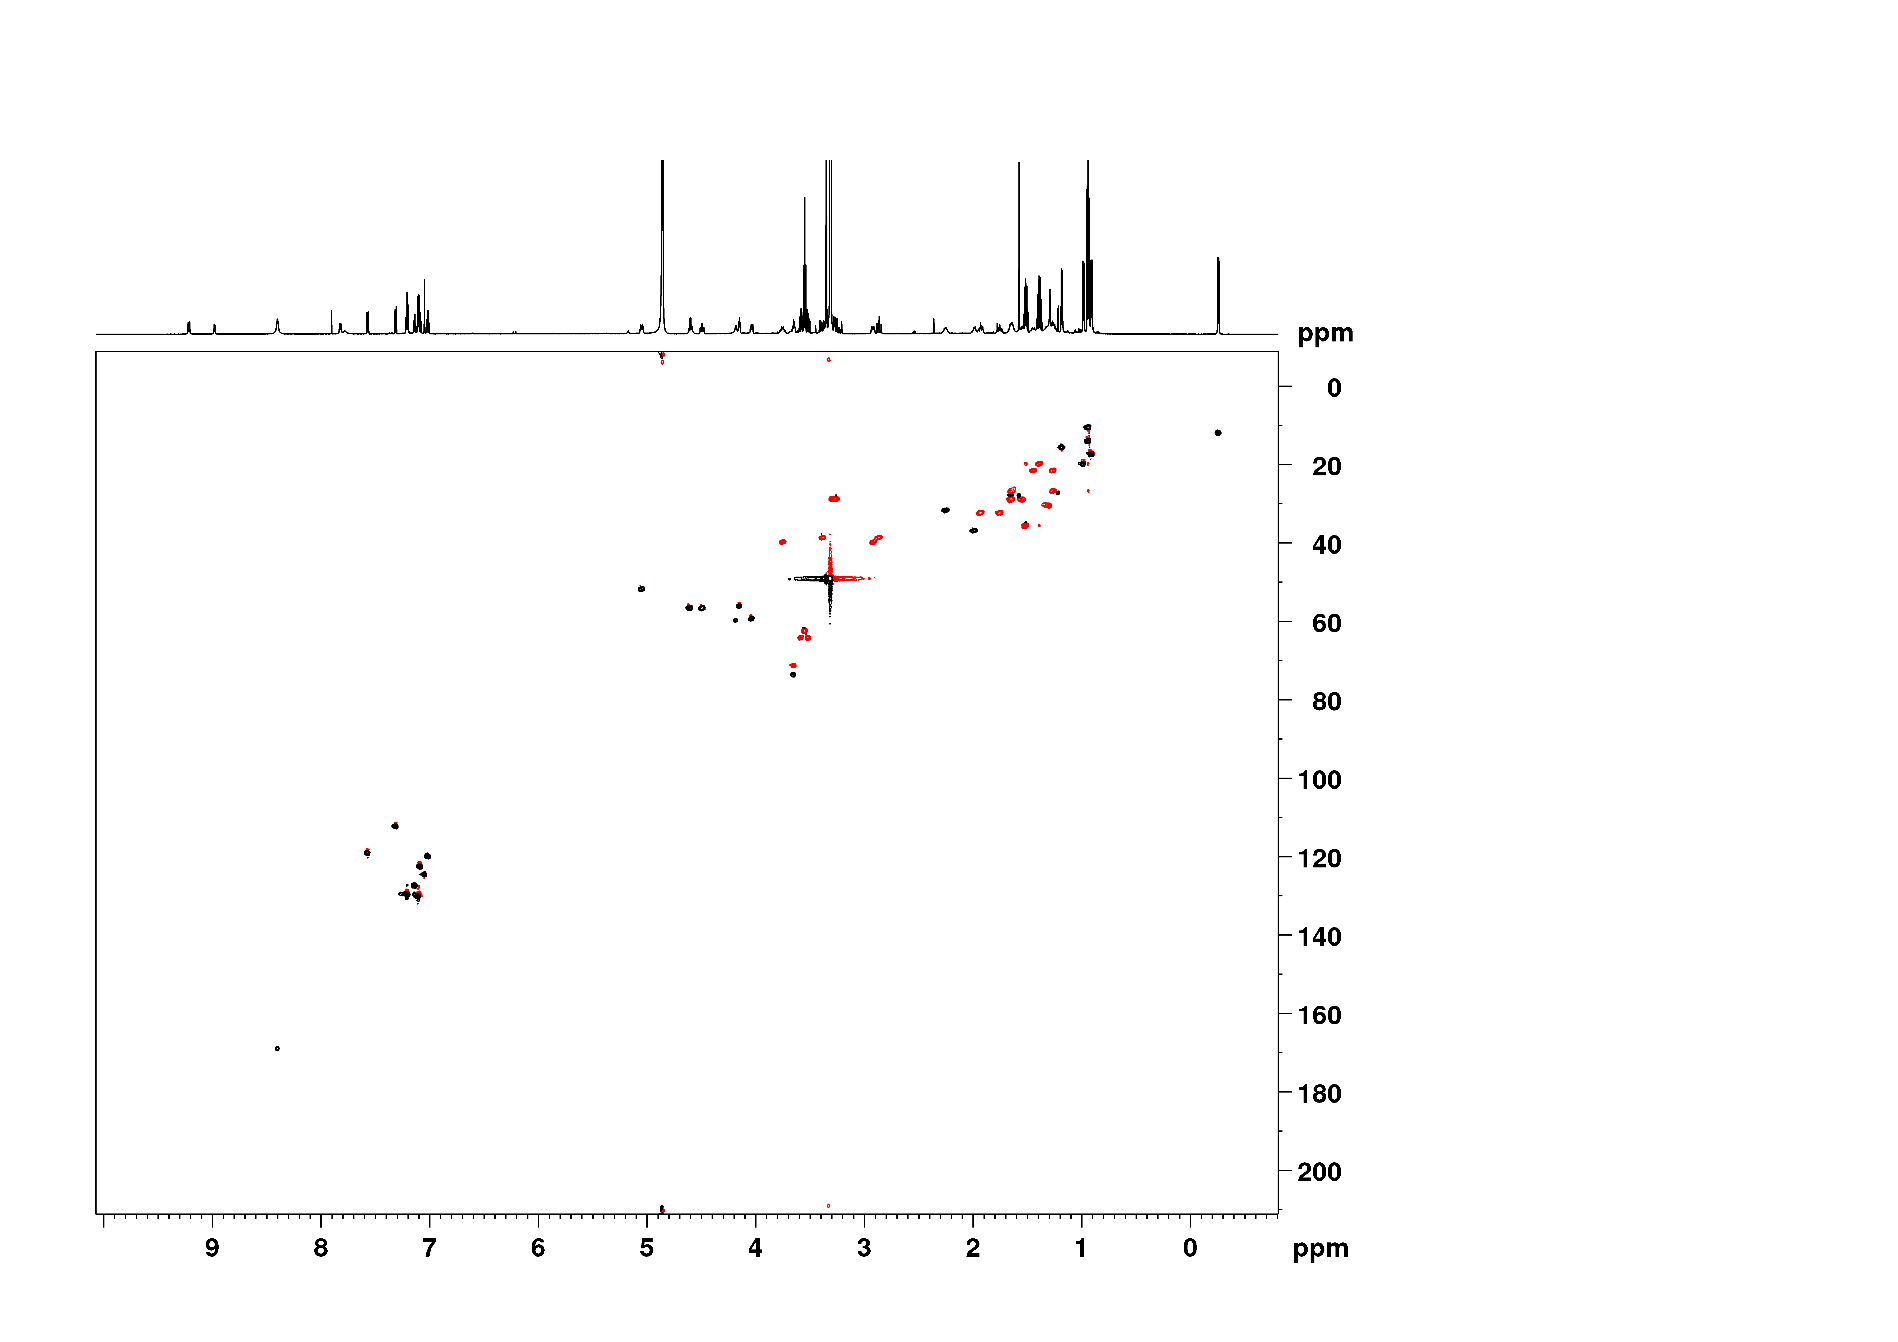


**Figure S6.** HSQC spectrum of anabenopeptin 802 (**2a**) (700 MHz, CD3OD)


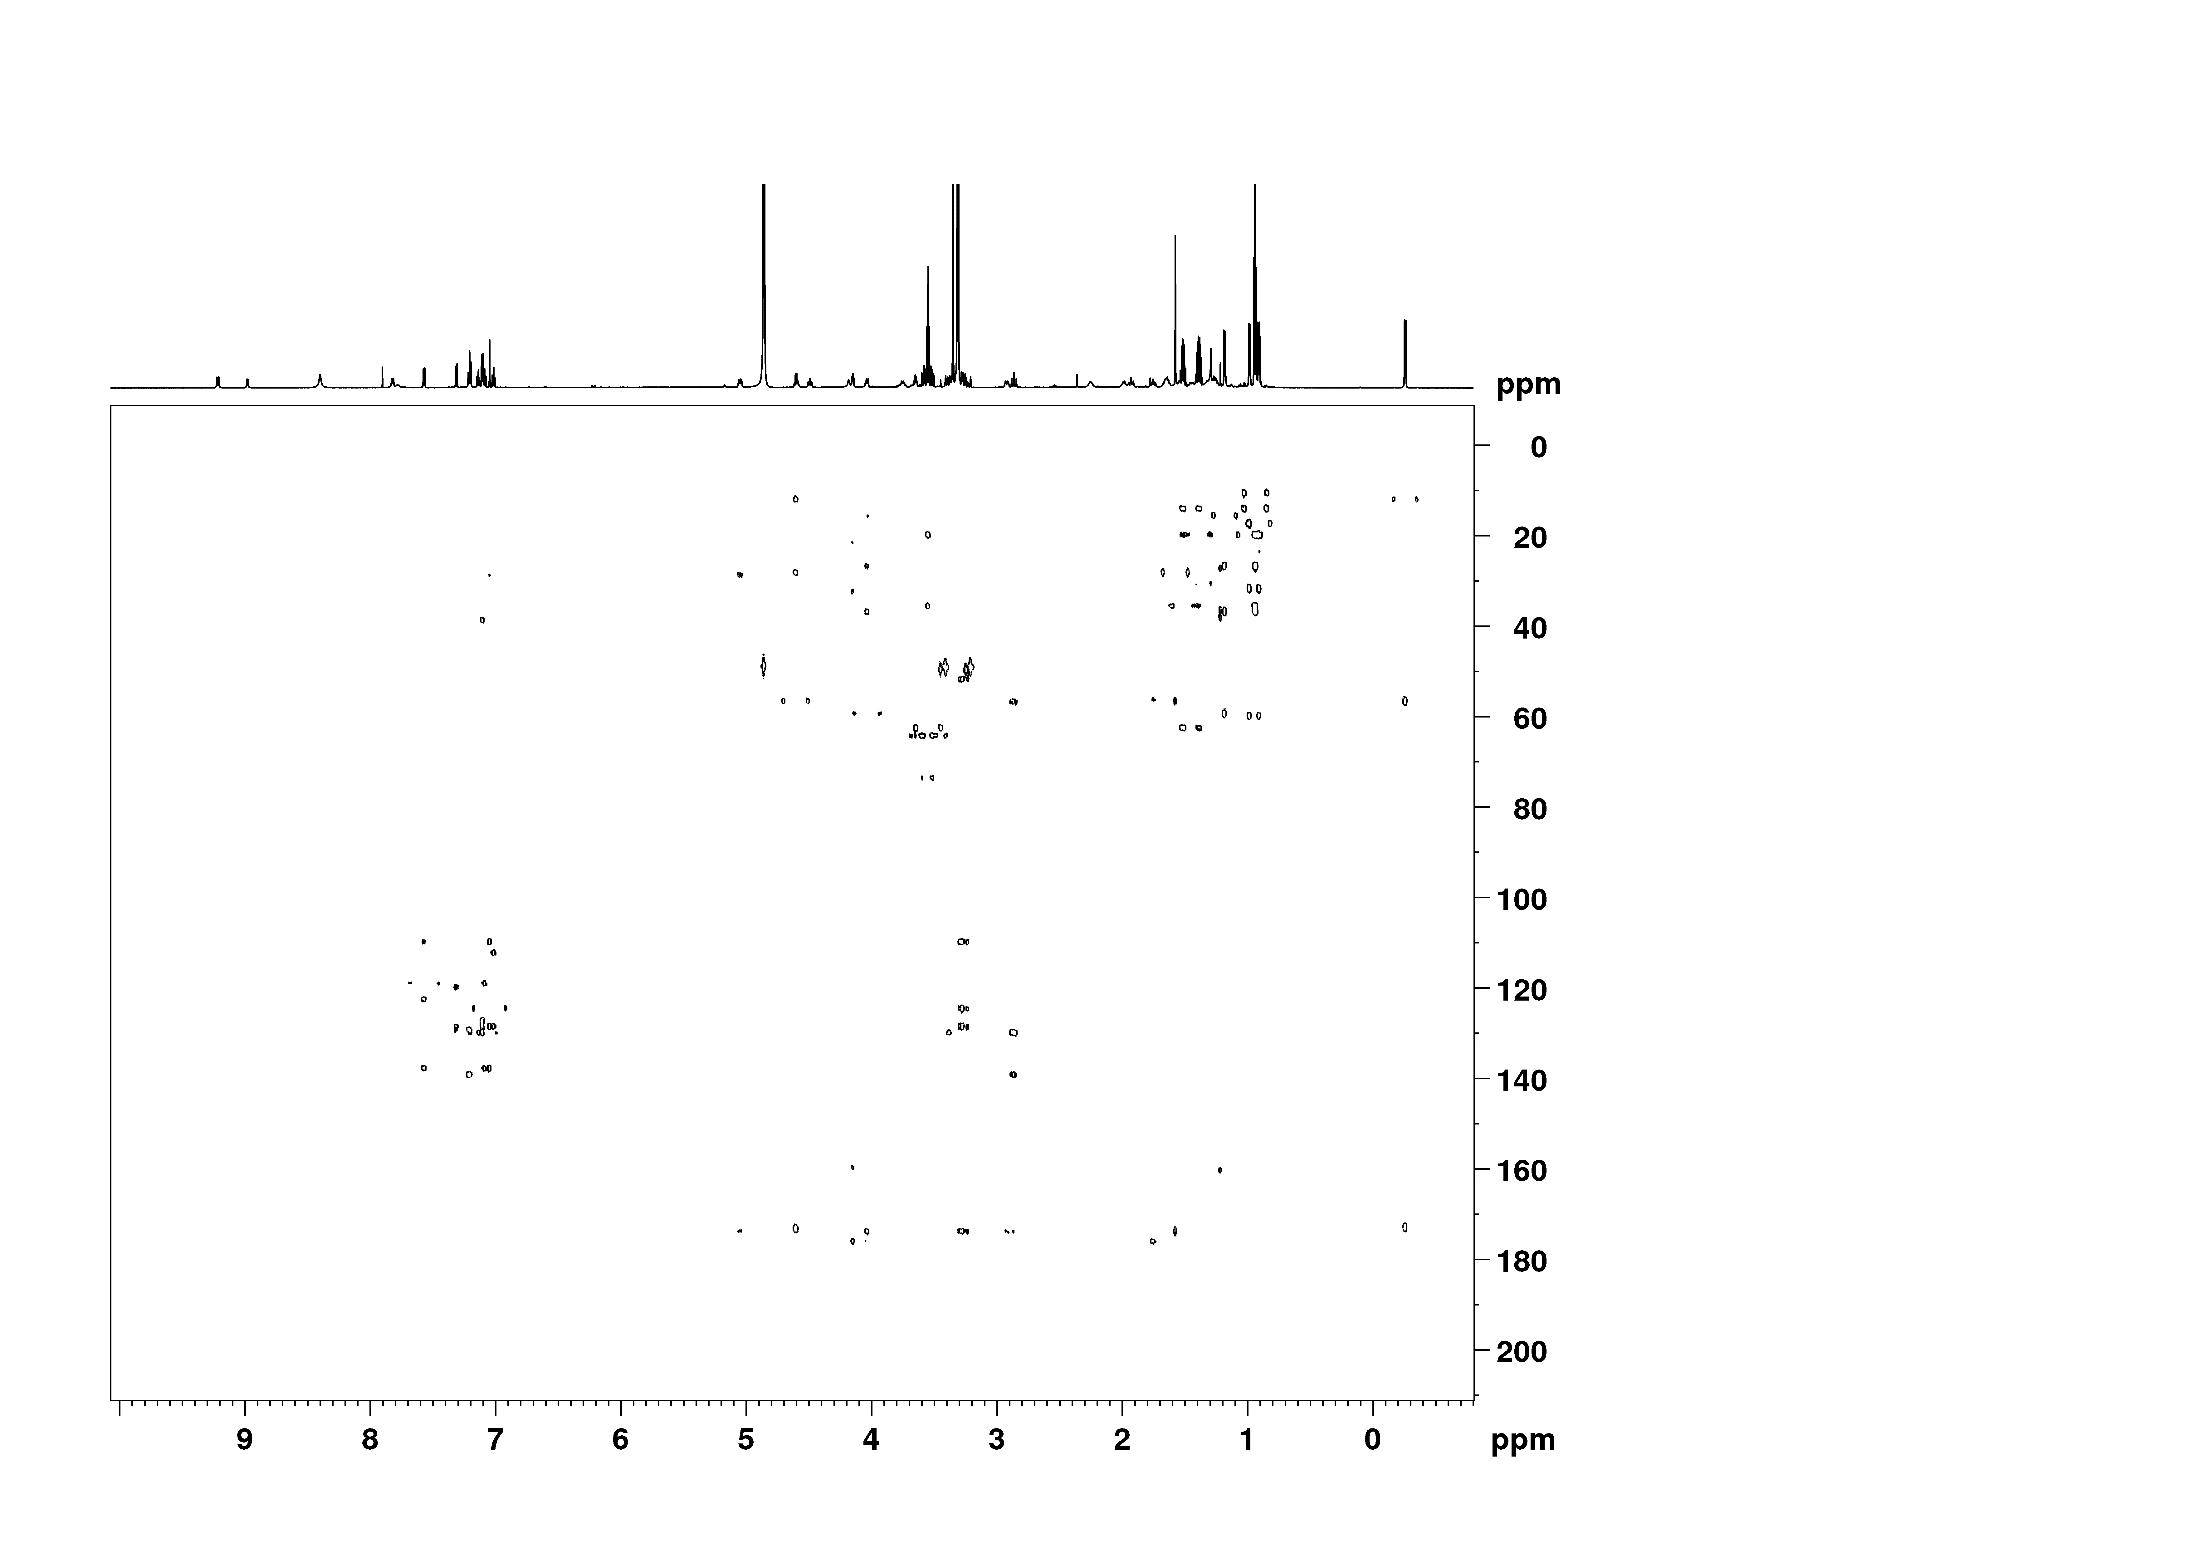


**Figure S7.** HMBC spectrum of anabenopeptin 802 (**2a**) (700 MHz, CD3OD)


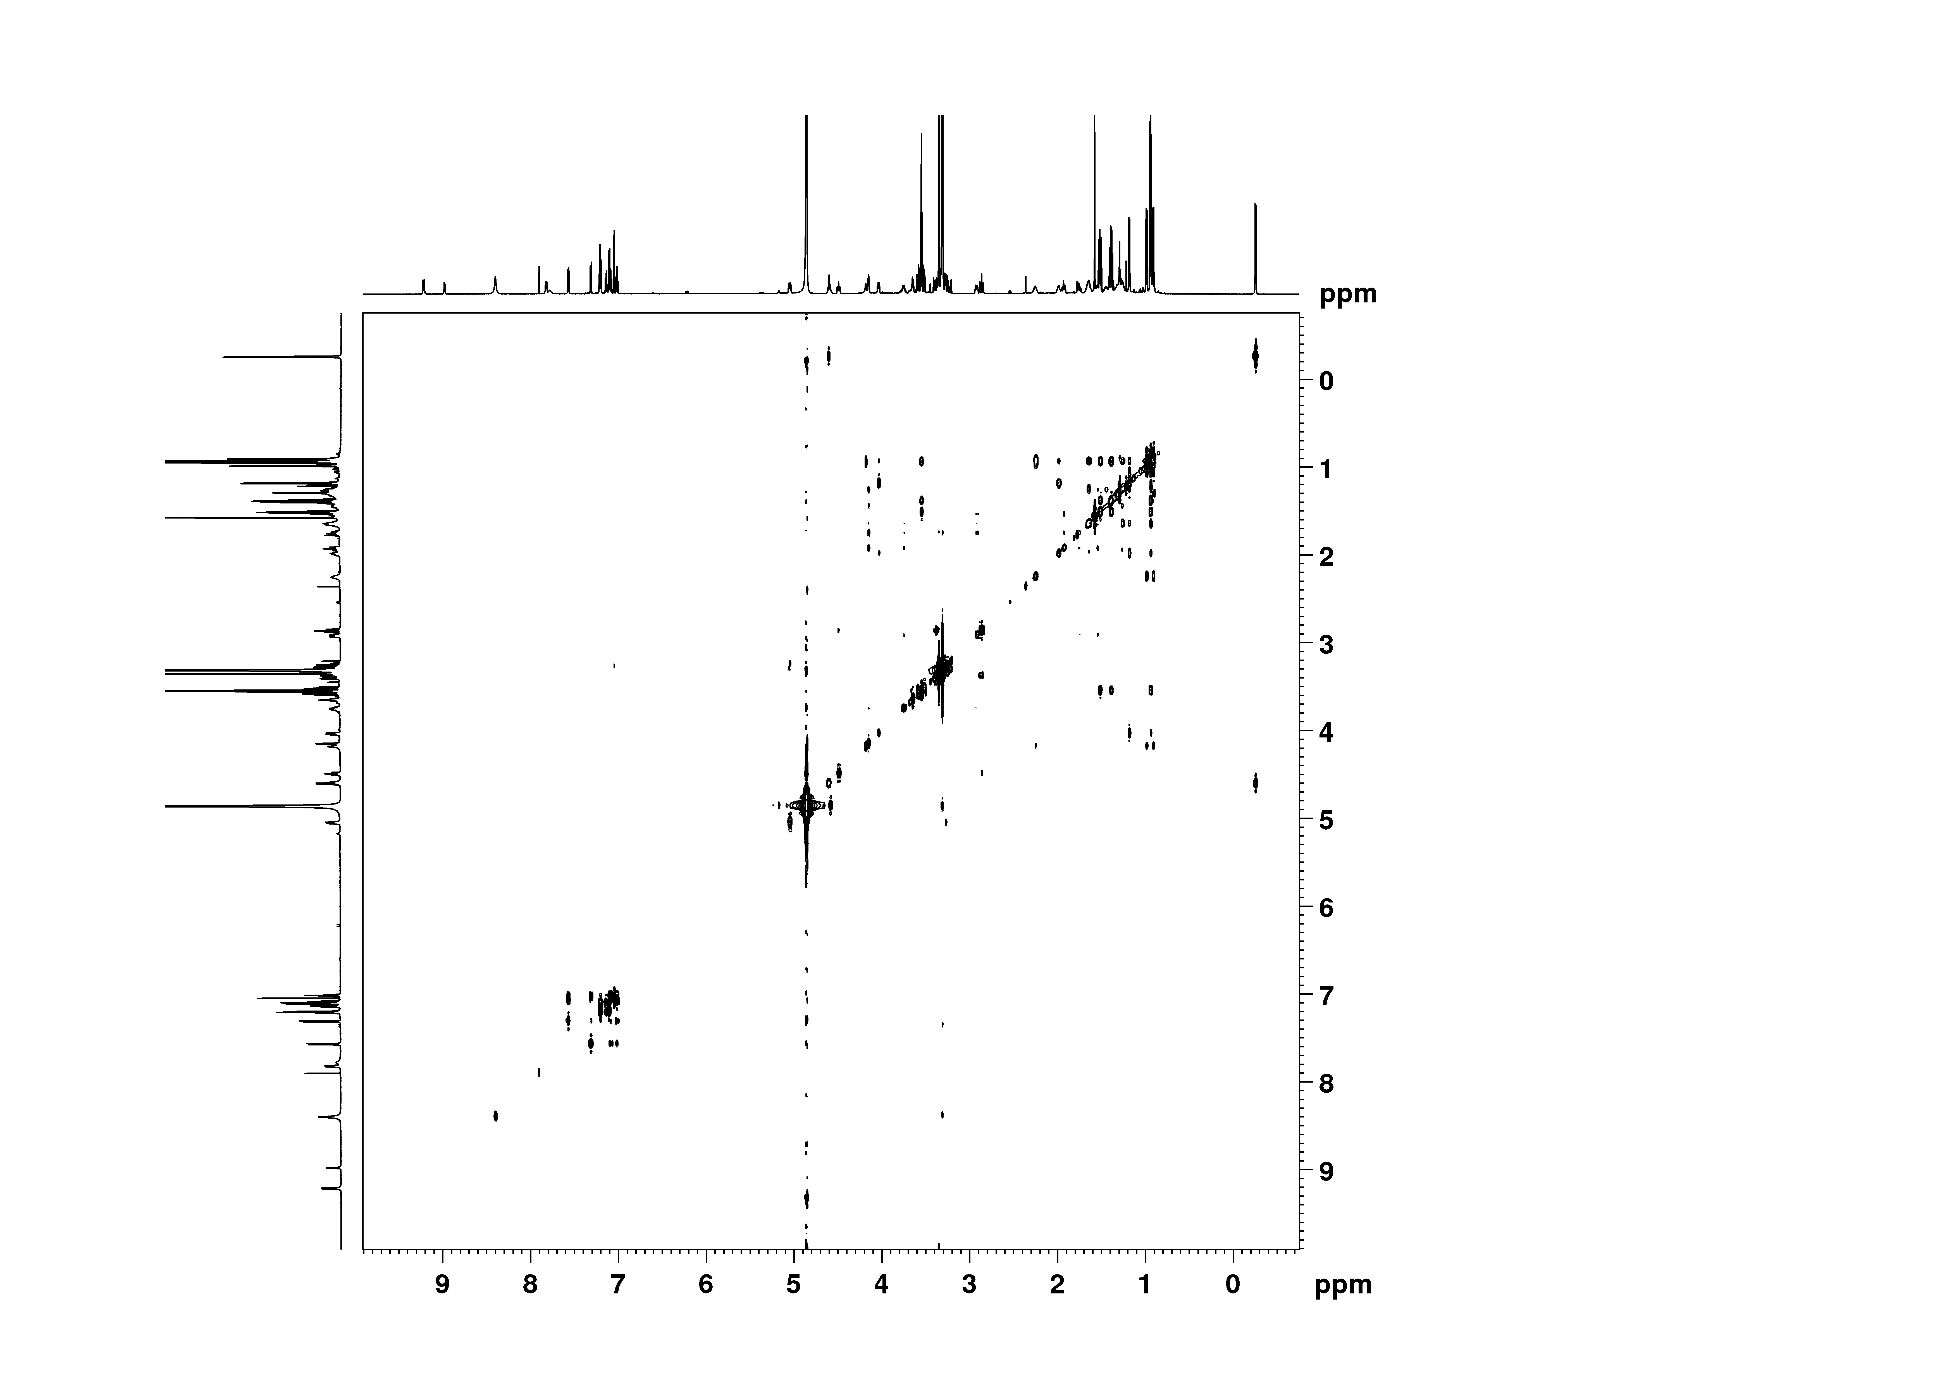


**Figure S8.** TOCSY spectrum of anabenopeptin 802 (**2a**) (700 MHz, CD3OD)

**Table S4.** NMR data of anabenopeptin 802b (**2b**) (700 MHz, CD3OD)

|  | Position | dC, type |  | dH, mult (J in Hz) | HMBCa | NOESY |  |
| --- | --- | --- | --- | --- | --- | --- | --- |
|  |  |  |  |  |  |  |  |
| Val | NH |  |  | 8.20, br s |  |  |  |
|  | 1 | 176.7, C |  | - |  |  |  |
| 2 | 59.2, CH |  | 4.20, d (3.8) | 1, 3,7 | 3,5 |  |
| 3 | 31.3, CH |  | 2.25, m |  |  |  |
| 4 | 17.2, CH3 |  | 0.92, d (6.8) |  | 3 |  |
| 5 | 19.8, CH3 |  | 1.00, dd (6.6, 1.9) |  | 3 |  |
|  |  |  |  |  |  |  |  |
| C=O | 6 | 159.6, C |  |  |  |  |  |
|  |  |  |  |  |  |  |  |
| Lys | NH |  |  | 8.20, br s |  |  |  |
|  | 1 | 176.3, C |  | - |  |  |  |
| 2 | 55.9, CH |  | 4.16, t (4.9) | 1, Val-NH | 3a, 4a |  |
| 3 | 31.1, CH2 | a | 1.73, ovl |  |  |  |
|  |  | b | 1.95, tt (13.8, 3.4) |  |  |  |
| 4 | 20.2, CH2 | a | 1.27, m |  |  |  |
|  |  | b | 1.47, m |  |  |  |
| 5 | 29.0, CH2 | a | 1.55, m |  |  |  |
|  |  | b | 1.62, m |  |  |  |
| 6 | 39.8, CH2 | a | 2.90, br d |  |  |  |
|  |  | b | 3.80, m |  |  |  |
|  | NH |  |  | 7.90, d (8.6) |  | 5b, 6a, 6b |  |
|  |  |  |  |  |  |  |  |
| Phe | NH |  |  | 9.20, d (8.7) |  | 2, 3a |  |
|  | 1 | 176.3, C |  | - |  |  |  |
| 2 | 56.9, CH |  | 4.47, ddd (12.1, 8.5, 3.1) | 1, 3a, 4 | 3a, 3b |  |
| 3 | 38.8, CH2 | a | 2.85, t (13.3) |  |  |  |
|  |  | b | 3.40, dd (13.5,3.1) |  |  |  |
| 4 | 139.1, C |  | - |  |  |  |
| 5/9 | 129.5, CH |  | 7.20, t (7.4) |  |  |  |
| 6/8 | 130.1, CH |  | 7.09, ovl | 4 | 2, 3a, H4-Leu, H5-Leu |  |
| 7 | 127.6, CH |  | 7.14, t (7.4) |  |  |  |
|  |  |  |  |  |  |  |  |
| NMeAla | 1 | 173.5, C |  | - |  |  |  |
| 2 | 56.5, CH |  | 4.60, q (6.7) | 3 | 3 |  |
| 3 | 10.7, CH3 |  | -0.25, d (6.6) |  |  |  |
| 4 | 27.6, CH3 |  | 1.58, s | 2 |  |  |
|  |  |  |  |  |  |  |  |
| Trp | NH |  |  | 9.00, d (3.4) |  |  |  |
|  | 1 | 173.6, C |  | - |  |  |  |
| 2 | 51.7, CH |  | 5.10, m |  |  |  |
| 3 | 28.3, CH2 |  | 3.30, d (5.1) | 1, 4, 5 | 2 |  |
| 4 | 109.5, C |  | - |  |  |  |
| 5 | 124.7, CH |  | 7.04, s | 4 |  |  |
| 6 | 128.5, C |  | - |  |  |  |
| 7 | 119.1, CH |  | 7.60, d (8.1) | 9, 11 | 2, 3, H2-Leu |  |
| 8 | 120.1, CH |  | 7.00, t (7.4) | 6, 10 |  |  |
| 9 | 122.5, CH |  | 7.09, ovl |  |  |  |
| 10 | 112.5, CH |  | 7.30, d (8.1) |  |  |  |
| 11 | 137.8, C |  | - |  |  |  |
|  | NH |  |  | 10.40, s |  |  |  |
|  |  |  |  |  |  |  |  |
| Leu | NH |  |  | 7.70, br s |  |  |  |
|  | 1 | 174.7, C |  | - |  |  |  |
| 2 | 53.5, CH |  | 4.30, m | 1, 3, 4 |  |  |
| 3 | 41.1, CH2 |  | 1.76, ovl |  |  |  |
| 4 | 25.4, CH |  | 1.87, m | 2, 3 |  |  |
| 5 | 22.3, CH3 |  | 1.00, dd (6.6, 1.9) |  | 1 |  |
| 6 | 23.0, CH3 |  | 1.05, d (6.4) |  | 3, 4 |  |

a Selected HMBC correlations from proton stated to the indicated carbon.


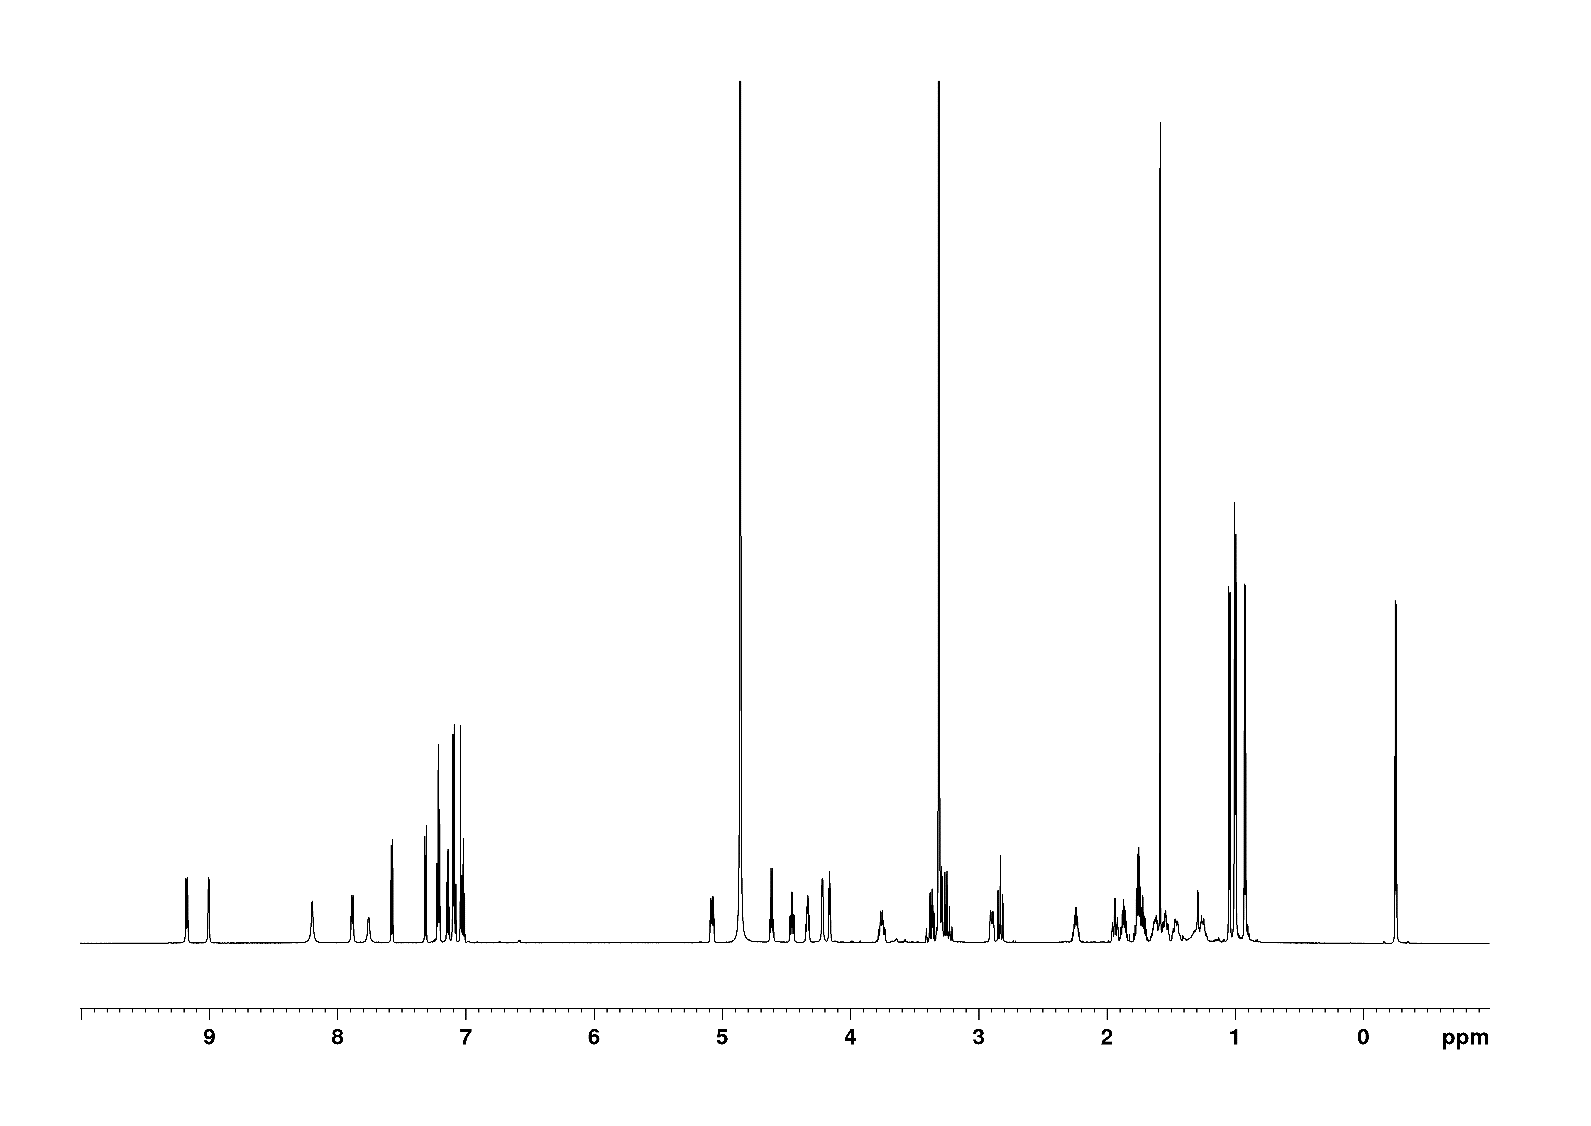


**Figure S9.** 1H-NMR spectrum of anabenopeptin 802b (**2b**) (700 MHz, CD3OD)


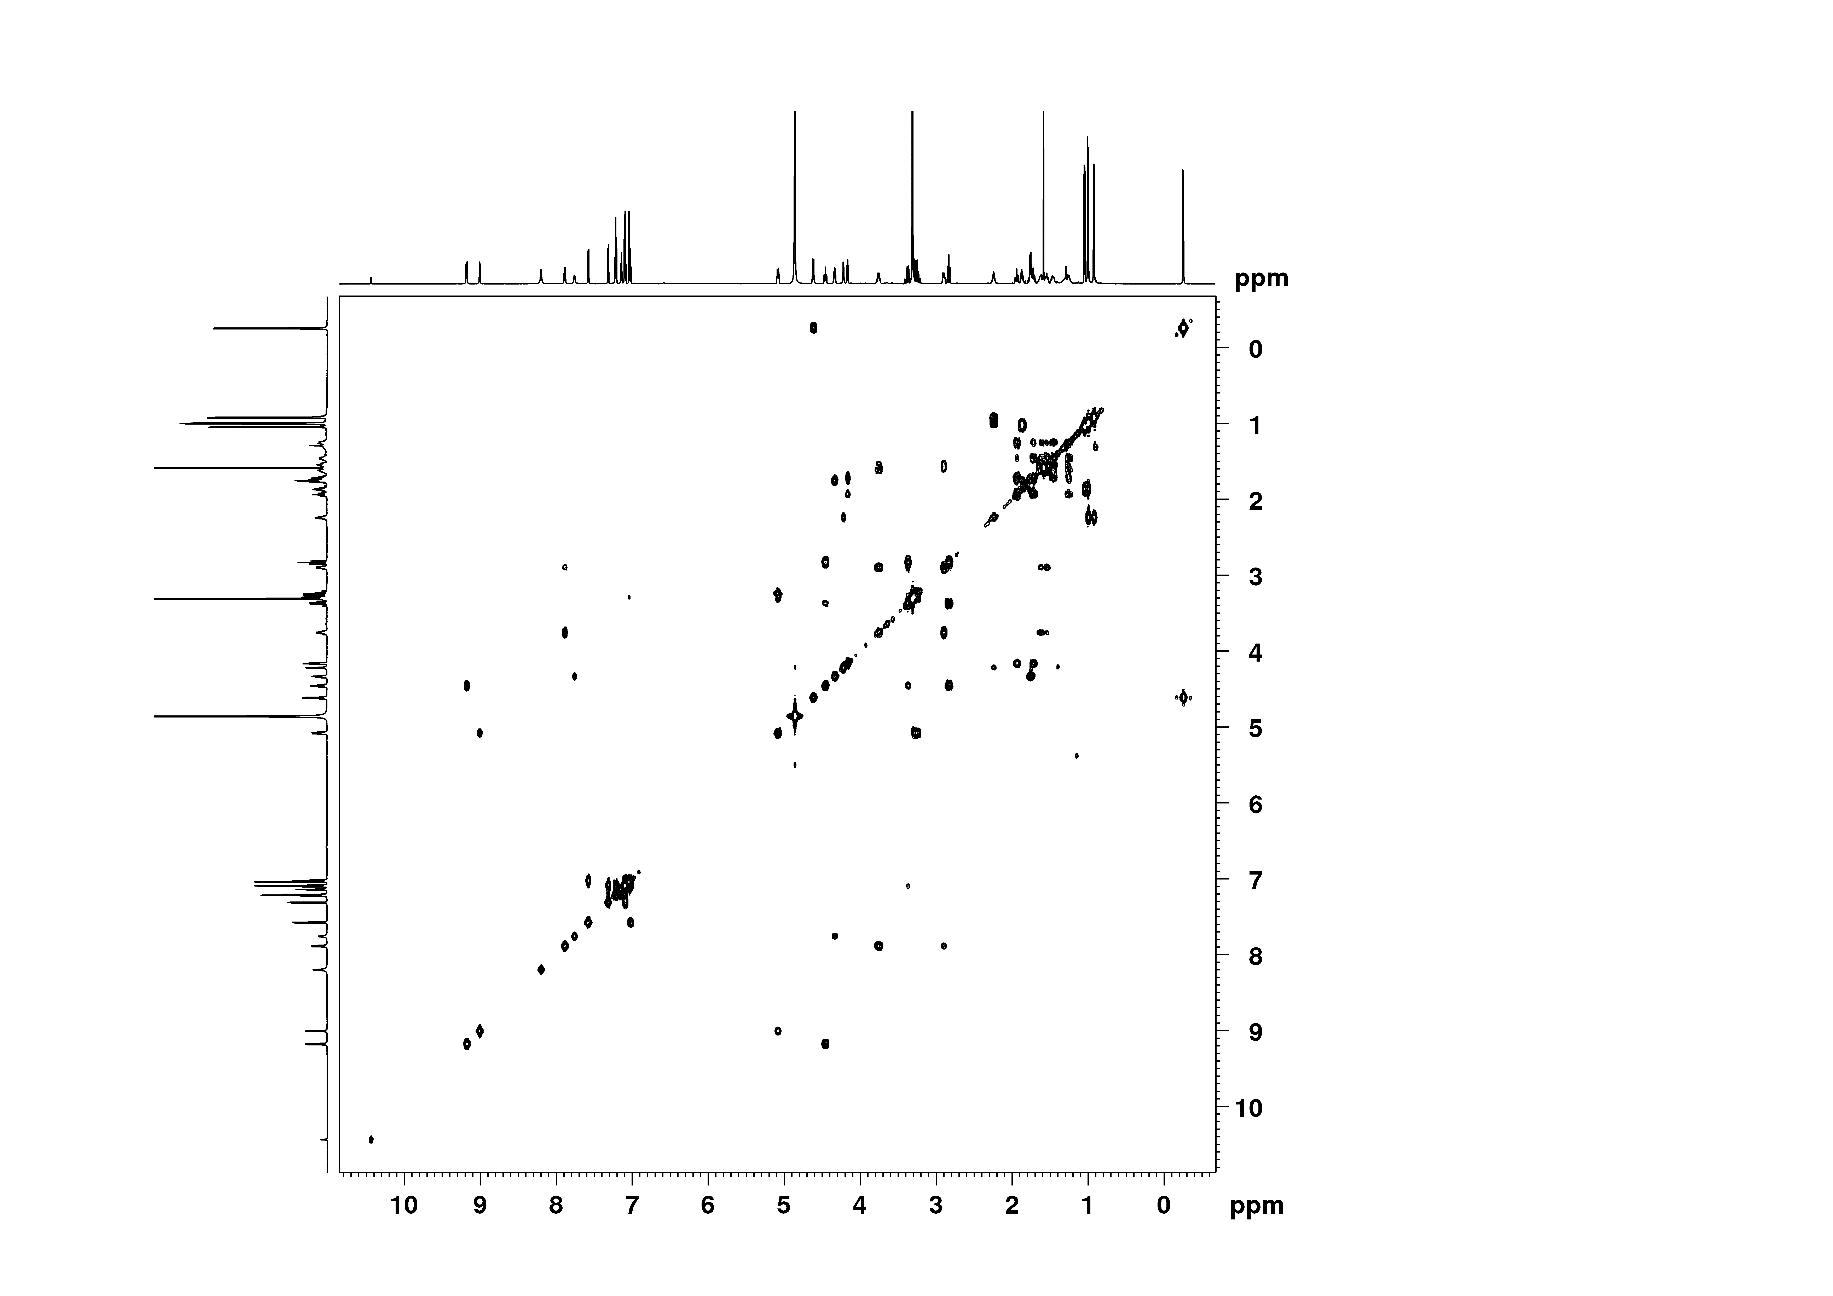


**Figure S10.** COSY spectrum of anabenopeptin 802b (**2b**) (700 MHz, CD3OD)


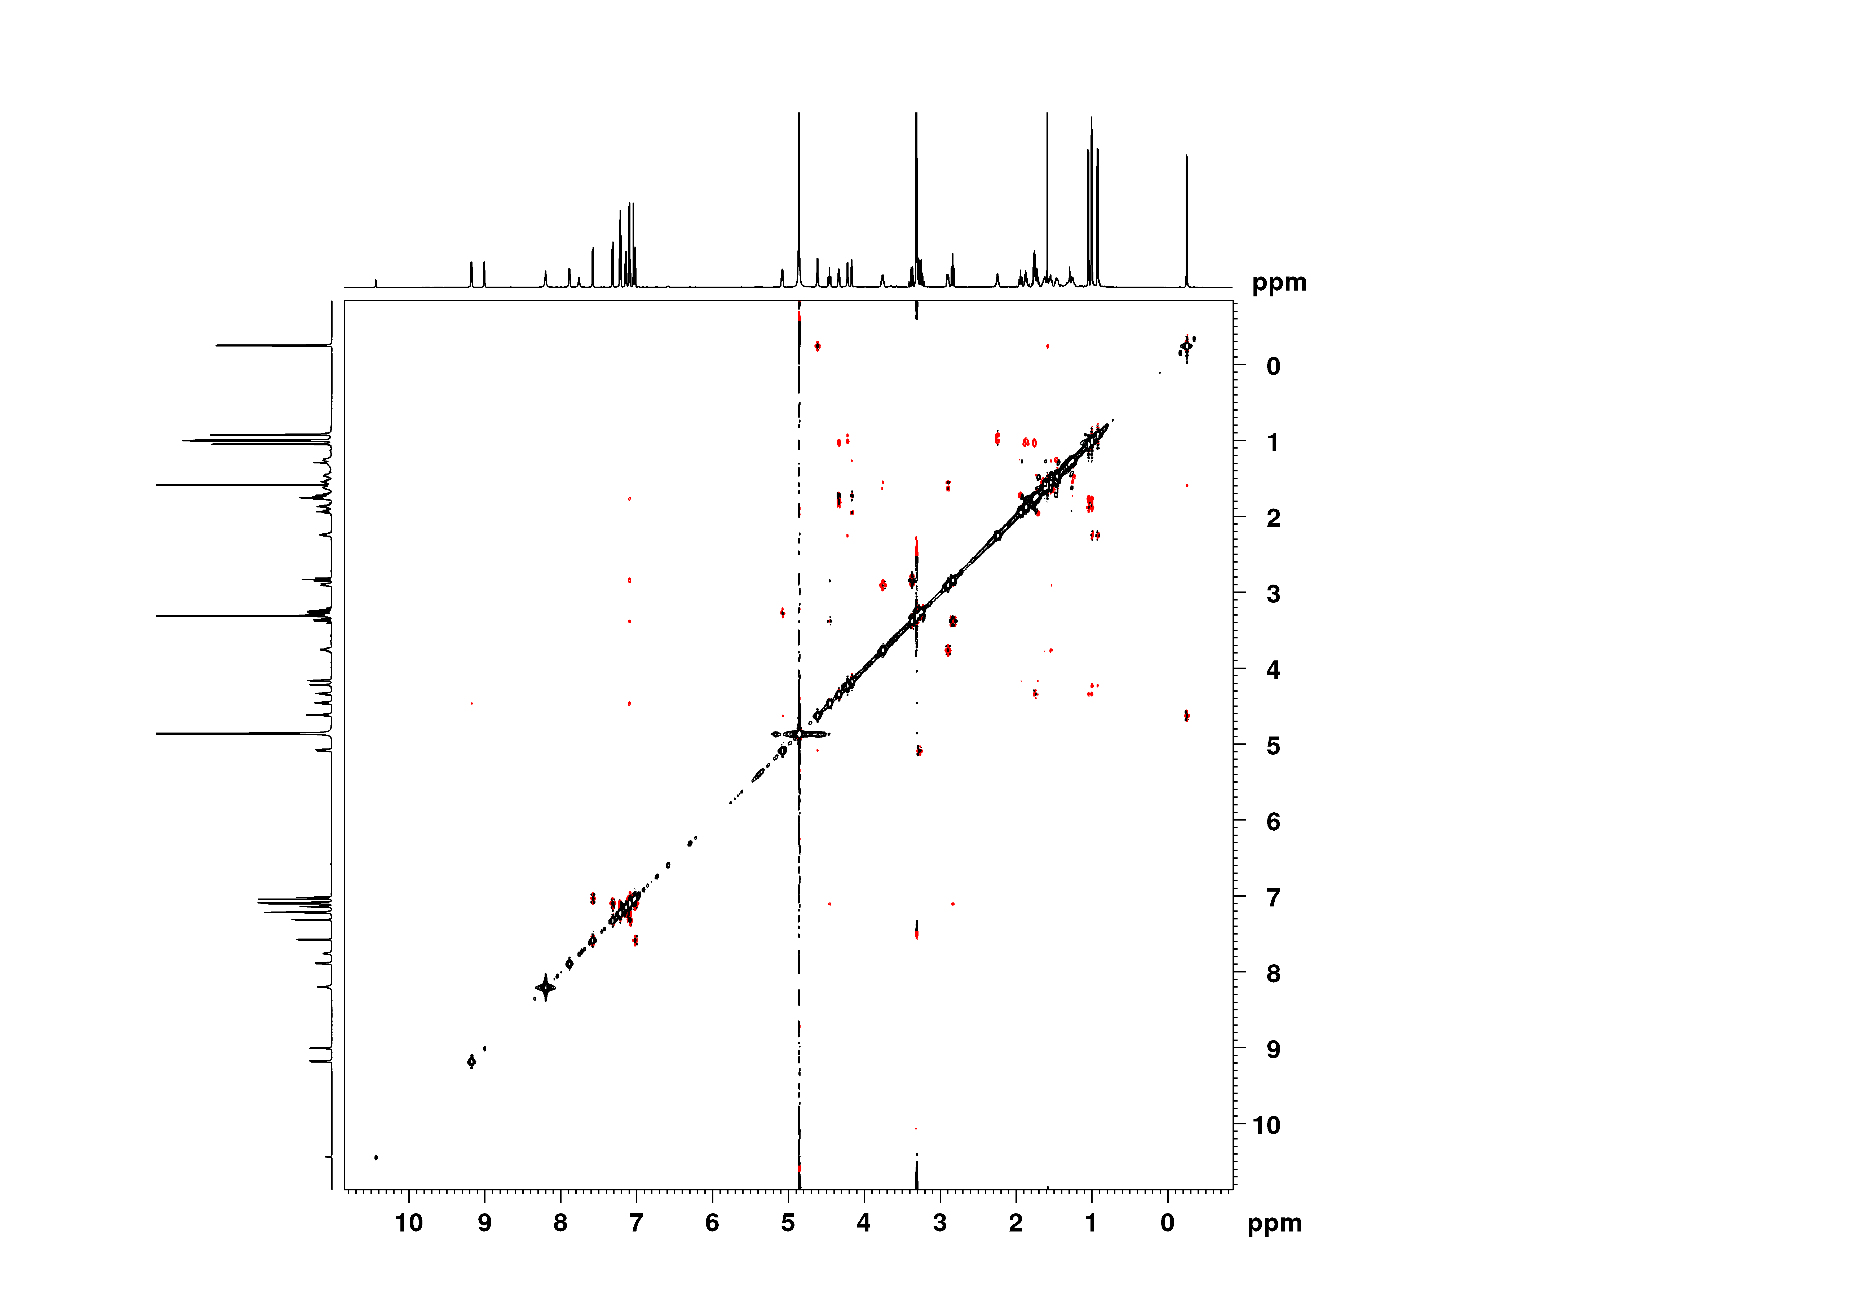


**Figure S11.** NOESY spectrum of anabenopeptin 802b (**2b**) (700 MHz, CD3OD)


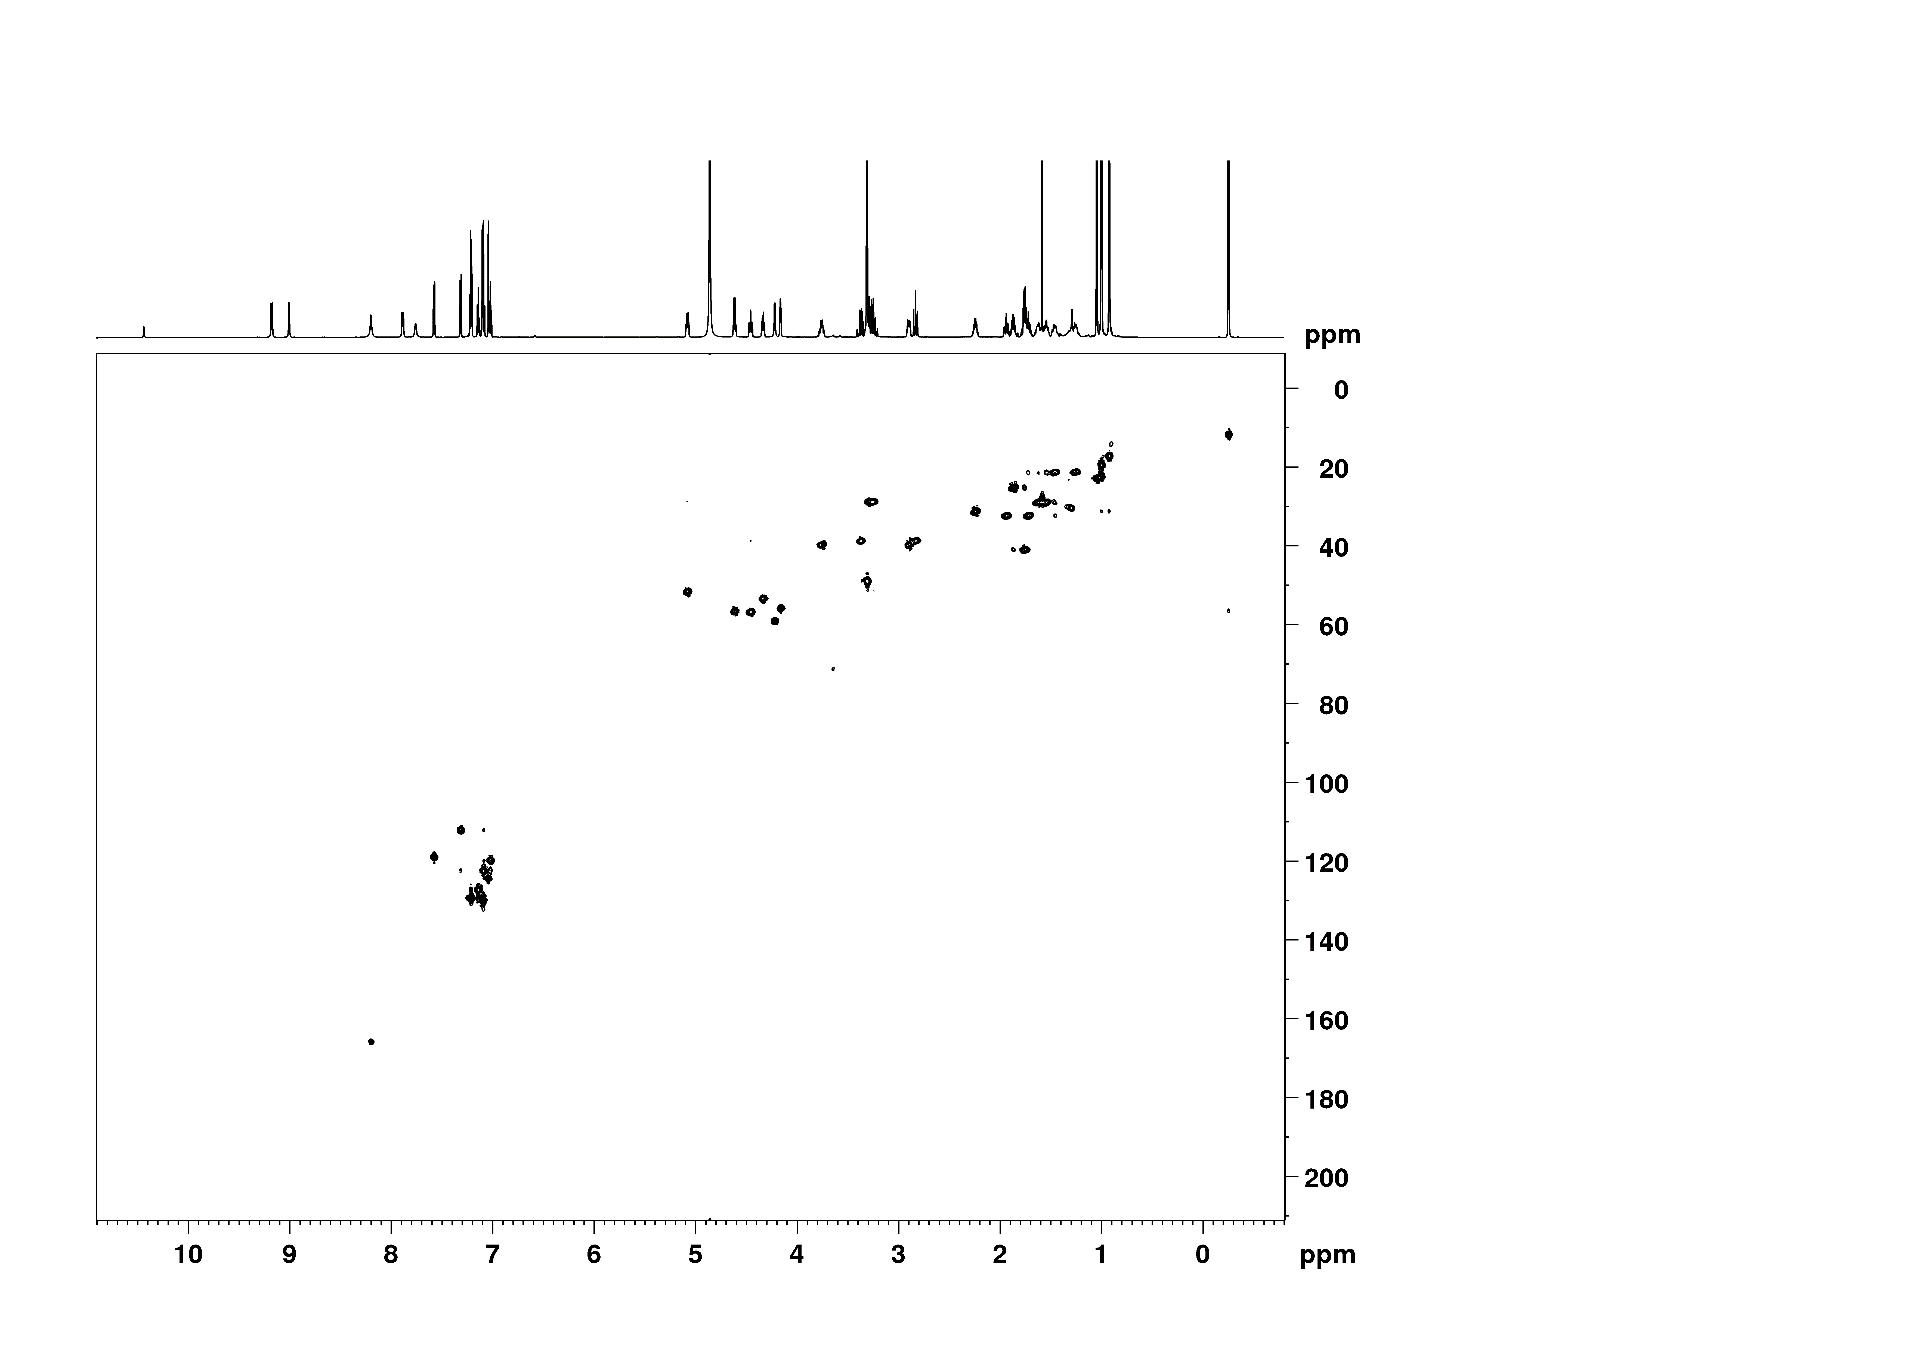


**Figure S12.** HSQC spectrum of anabenopeptin 802b (**2b**) (700 MHz, CD3OD)


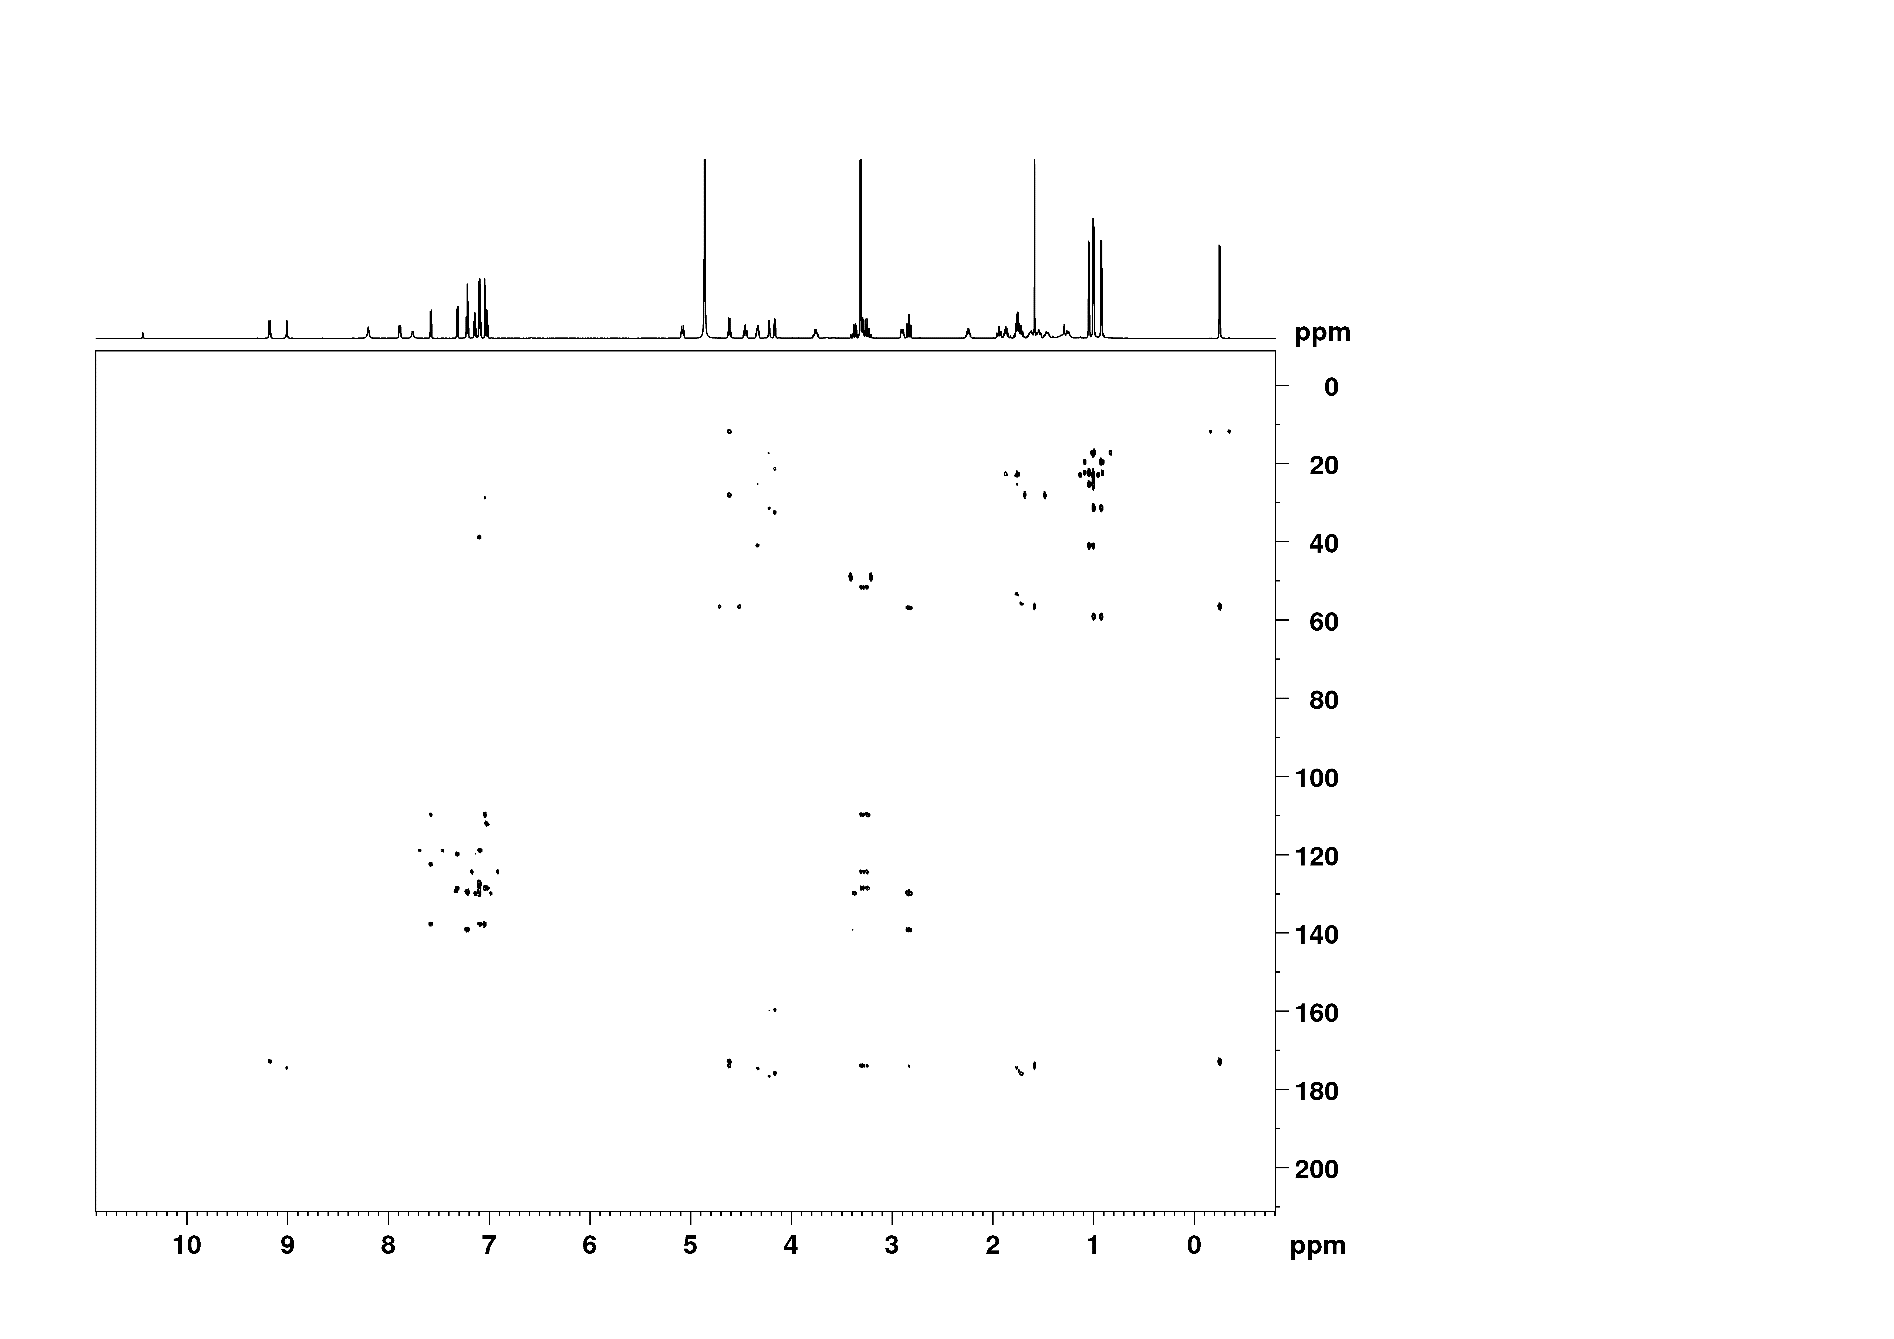


**Figure S13.** HMBC spectrum of anabenopeptin 802b (**2b**) (700 MHz, CD3OD)


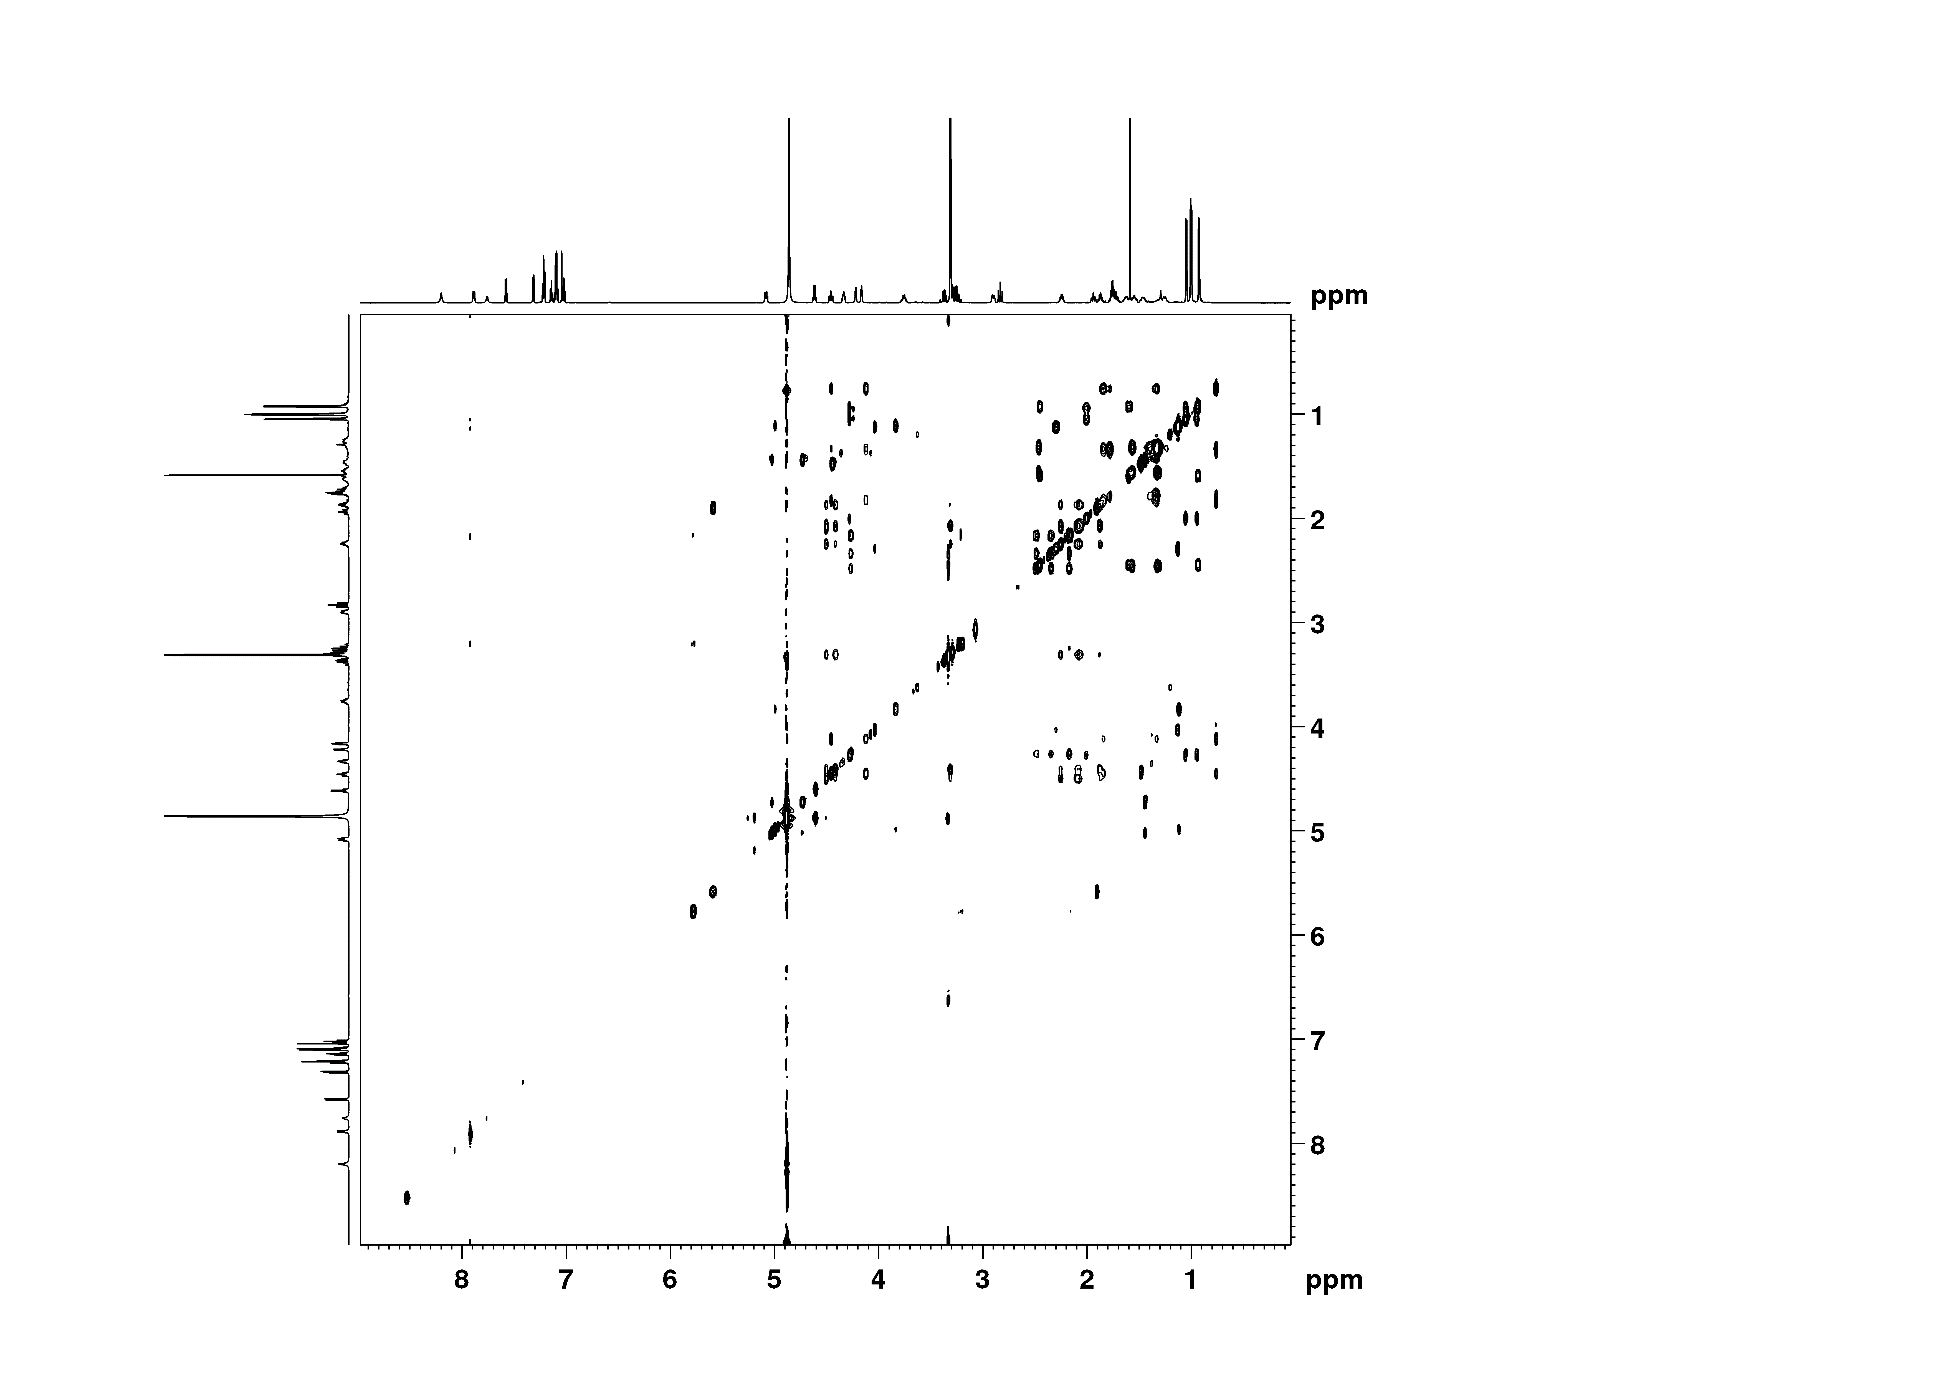


**Figure S14.** TOCSY spectrum of anabenopeptin 802b (**2b**) (700 MHz, CD3OD)
